# Controlled ovarian hyperstimulation for IVF: impact on ovarian, endometrial and cervical cancer—a systematic review and meta-analysis

Charalampos Siristatidis<sup>1</sup>, Theodoros N. Sergentanis<sup>2†</sup>,  
Prodromos Kanavidis<sup>2†</sup>, Marialena Trivella<sup>3,4</sup>, Marianthi Sotiraki<sup>2</sup>,  
Ioannis Mavromatis<sup>2</sup>, Theodora Psaltopoulou<sup>2</sup>, Alkistis Skalkidou<sup>5</sup>,  
and Eleni Th. Petridou<sup>2</sup>

<sup>1</sup>Assisted Reproduction Unit, 3rd Department of Obstetrics and Gynecology, University of Athens, Attikon Hospital, Chaidari, Greece  
<sup>2</sup>Department of Hygiene, Epidemiology and Medical Statistics, Medical School, University of Athens, 75 M. Asias Str, Athens 11745, Greece  
<sup>3</sup>UK Cochrane Centre, National Institute of Health Research, Oxford University Hospitals, Summertown Pavillion, Oxford, UK <sup>4</sup>Centre for Statistics in Medicine, University of Oxford, Wolfson College Annexe, Linton Rd, Oxford OX2 6UD, UK <sup>5</sup>Department of Women's and Children's Health, Uppsala University, Uppsala, Sweden

Correspondence address. E-mail: [epetrid@med.uoa.gr](mailto:epetrid@med.uoa.gr)

Submitted on July 25, 2012; resubmitted on October 4, 2012; accepted on October 23, 2012

## TABLE OF CONTENTS

- Introduction
- Methods
  - Search strategy for the identification of studies
  - Study eligibility
  - Data extraction
  - Assessment of quality of included studies
  - Assessment of risk of bias across studies
  - Data synthesis
- Results
  - Results of the search strategy
  - Quality of included studies
  - Analyses by cancer type
- Discussion

**BACKGROUND:** In response to the ongoing debate on the long-term effects of assisted reproduction technologies, such as IVF, we systematically reviewed and meta-analyzed available evidence on the association between controlled ovarian hyperstimulation for IVF and risk of ovarian, endometrial and cervical cancer.

**METHODS:** Eligible studies were identified and pooled effect estimates for relative risk (RR) were calculated by cancer type among two reference groups (general population or infertile women), through fixed- or random-effects models as appropriate.

**RESULTS:** Nine cohort studies were synthesized, corresponding to a total size of 109 969 women exposed to IVF, among whom 76 incident cases of ovarian, 18 of endometrial and 207 cases of cervical cancer were studied. The synthesis of studies with general population as the reference group pointed to a statistically significant positive association between IVF and increased risk for ovarian (RR = 1.50, 95%

† Equal contribution.

confidence interval (CI): 1.17–1.92) and endometrial (RR = 2.04, 95% CI: 1.22–3.43), but not cervical (RR = 0.86, 95% CI: 0.49–1.49) cancers. On the contrary, when infertile women were used as the reference group, no significant associations with ovarian, endometrial or cervical cancer types were noted (RR = 1.26, 95% CI: 0.62–2.55 RR = 0.45, 95% CI: 0.18–1.14 and RR = 5.70, 95% CI: 0.28–117.20, respectively).

**CONCLUSIONS:** IVF does not seem to be associated with elevated cervical cancer risk, nor with ovarian or endometrial cancer when the confounding effect of infertility was neutralized in studies allowing such comparisons. Of note, only one study provided follow-up longer than 10 years for the group exposed to IVF. Future cohort studies should preferably use infertile women as the reference group, rely on IVF-registered valid exposure data, adjust for a variety of meaningful confounders and adopt relatively longer follow-up periods before sound conclusions are drawn.

**Key words:** ovarian cancer / endometrial cancer / cervical cancer / infertility / IVF

## Introduction

Prevention and treatment of subfertility is an emerging public health priority in developed countries (Wright et al., 2005; CDC, 2010). In the USA alone a dismal figure of up to 7.7 million women of fertile age (15–44 years) are estimated to seek medical advice for fertility problems by the year 2025 (Stephen and Chandra, 1998). Postponement of the first pregnancy to a later age on account of the need to pursue career opportunities, along with the growing awareness of treatment options, are linked with advanced maternal age, whereas ovarian ageing and infertility seem counterbalanced by the success of assisted reproduction technologies (ARTs) (Connolly et al., 2009; Kimberly et al., 2012). As a result, an upward trend in the number of women receiving subfertility treatment has been noted; nowadays, a large proportion of these women are undergoing ovarian stimulation and IVF.

Reports on a tentative association between fertility medication received for ovarian stimulation and several types of gynaecological cancer, notably ovarian, endometrial and cervical types, have emerged since the mid-1960s, but sound scientific evidence is still limited. The earlier published positive findings (Whittemore et al., 1992; Rossing et al., 1994; Akhmedkhanov et al., 2001b; Brinton et al., 2005; Brinton, 2007) were subject to several limitations, including small sample size, bias, imprecise information on drug exposure, namely type and duration of treatment and indications; furthermore, a lack of control for important confounding factors, such as causes of subfertility, parity or family history of cancer is noted. In addition, most studies tended to suffer from insufficient follow-up periods thereby preventing the accurate calculation of long-term treatment effect estimates (Land and Evers, 2003; Kashyap et al., 2004; Brinton et al., 2005; Mahdavi et al., 2006; Choi et al., 2007; Cetin et al., 2008; Jensen et al., 2008, 2009a, b; Källén, 2008; Zreik et al., 2008; Vlahos et al., 2010a; Impicciatore and Tiboni, 2011). Actually, the evidence regarding a tentative direct tumorigenic effect of fertility medication for ovarian stimulation is weak and controversial and relies mainly on *in vitro* studies (Huhtaniemi, 2010).

Specific types of gynecological cancers have been traditionally associated with early age of menarche and late age of menopause (Vo and Carney, 2007), low parity, infertility (Stadel, 1975; Ron et al., 1987; Dahlgren et al., 1991; Brinton et al., 1992, 2004; Adami et al., 1994; Venn et al., 1995; Bristow and Karlan, 1996; Meirrow and Schenker, 1996; Klip et al., 2000; Ness et al., 2002; Brinton, 2007; Cetin et al., 2008; Jensen et al., 2008, 2009a, b; Källén, 2008; Salehi et al., 2008; Zreik et al., 2008; Sueblinvong and Carney, 2009), tubal factor and

unexplained infertility (Venn et al., 1999; Ness et al., 2002; Cetin et al., 2008), as well as ovulatory disorders, such as polycystic ovary syndrome (PCOS) (Escobedo et al., 1991; Rossing et al., 1994; Homburg, 1996; Schildkraut et al., 1996; Gregory et al., 2002), endometriosis (Brinton et al., 2004; Ness and Modugno, 2006; Vlahos et al., 2010b) and germline mutations in *BRCA* genes associated with occult primary ovarian insufficiency (Whittemore et al., 1992; Goshen et al., 1998; Brinton et al., 2004; Cetin et al., 2008; Källén, 2008; Zreik et al., 2008; Oktay et al., 2010; Impicciatore and Tiboni, 2011; Källén et al., 2011). The use of gonadotrophins along with other medications is considered a necessary step for controlled ovarian hyperstimulation (COH) in IVF, so as to maximize the chances of a positive outcome; their popularity as the preferred prescription has been steadily increasing over the last 30 years (Wysowski, 1993). Gonadotrophins are known to induce a variety of biological effects in the epithelium; changes in cell proliferation, apoptosis, cell adhesion and chemosensitivity have been frequently reported (Risch, 1998; Konishi et al., 1999; Konishi, 2006) along with up to a five-fold increase in normal blood concentrations of estradiol (MacLachlan et al., 1989). In order to inhibit a premature rise in LH and prevent ovulation, GnRH agonists and antagonists are the most frequently used components of the regimens; small continuous doses of agonists exert a reversible biochemical castration by removing the overlay of gonadal steroids (Conn and Crowley, 1994), while antagonists directly prevent a premature rise of LH (Olivennes, 2006).

Epithelial ovarian cancer is the sixth most common cancer among females (Permeth-Wey and Sellers, 2009), accounting for 4% of all cases (Meirrow and Schenker, 1996), and the most life-threatening gynecological cancer with a 5-year survival of only 30–35% (Ahmed et al., 1996). Several theories have been developed for ovarian tumorigenesis, including 'Fathalla's incessant ovulation' (Fathalla, 1971; Casagrande et al., 1979), puncture trauma during oocyte retrieval (Merviel et al., 2009), depletion of ovarian follicles (Smith and Xu, 2008), inflammation (Ness and Cottreau, 1999), stromal entrapment of the surface epithelium (Cramer and Welch, 1983) and endometriosis (Paulson, 1997; Ness and Modugno, 2006). Others pertain to the role of androgen/progesterone (Risch, 1998; Cottreau et al., 2003), and gonadotrophins combined with the presence of estrogens and growth factor receptors (Stadel, 1975; Cramer and Welch, 1983; Wimalasena et al., 1992; Bast et al., 1993; Lukanova and Kaaks, 2005; Konishi, 2006; Choi et al., 2007; Huhtaniemi, 2010). The underlying pathophysiological mechanisms implicate increased serum gonadotrophins (Mohle et al., 1985; Shoham, 1994) and steroid levels (Fishel and Jackson, 1989; Clinton and Hua,

1997; Bai *et al.*, 2000; Kraemer *et al.*, 2001). The inflammatory environment (Ness and Cottreau, 1999), the increased cell proliferation and transformation of surface cells (Bai *et al.*, 2000; Parrott *et al.*, 2001; Choi *et al.*, 2002) and/or the compromised DNA synthesis and subsequent errors (Murdoch, 2003; Tonguç *et al.*, 2011) may constitute further mechanisms. Finally, an altered paracrine activity (Wang *et al.*, 2002; Hu *et al.*, 2003; Choi *et al.*, 2005), the expression of molecular activators and genes (Chien *et al.*, 1994; Doraiswamy *et al.*, 2000; Gregory *et al.*, 2002; Rimon *et al.*, 2004; Choi *et al.*, 2005) and induction of immune tolerance (Bukovsky, 2006; Labidi-Galy *et al.*, 2011) together with the protein kinase C pathway (Ohtani *et al.*, 2001; Sheng *et al.*, 2003) may contribute to the pathogenesis. Moreover, surprisingly, recent findings implicated the Fallopian tube fimbria as a possible site of origin of ovarian carcinomas (Karst and Drapkin, 2010). Direct attribution remains, however, controversial (Balen, 1995; Glud *et al.*, 1998; Roger *et al.*, 1998; Zheng *et al.*, 2000; Akhmedkhanov *et al.*, 2001a; Basille *et al.*, 2006; Choi *et al.*, 2007; Huhtaniemi, 2010).

Endometrial cancer, the most common malignancy of the lower female genital tract, accounting for 8% of all cases (Boring *et al.*, 1994; Bamberger *et al.*, 1998; Akhmedkhanov *et al.*, 2001a), is a hormone-dependent malignancy in the majority of cases. Actually, a hyper-estrogenic milieu and changes in endometrial secretory profiles through higher concentrations of various molecules caused by supra-physiological gonadotrophin levels during COH (Fishel and Jackson, 1989; Boomsma *et al.*, 2010) represent risk factors. Of note, PCOS (through anovulation) and unexplained infertility have also been linked directly to endometrial cancer (Escobedo *et al.*, 1991; Homburg, 1996; Venn *et al.*, 1999; Gregory *et al.*, 2002; Navaratnarajah *et al.*, 2008).

Cervical cancer has been linked to factors causing infertility, such as pelvic adhesions or tubal stenosis on account of previous pelvic infections (Dor *et al.*, 2002; Lerner-Geva *et al.*, 2003), whereas nowadays human papilloma virus is considered the main risk factor for the disease. Similarly, higher rates of human papilloma virus (Spandorfer *et al.*, 2006) and/or abnormal cervical smears (van Hamont *et al.*, 2006) have been associated with higher numbers of cervical procedures, hence an increased need for multiple IVF attempts (Jakobsson *et al.*, 2008); yet, these claims have been disputed by others (Strehler *et al.*, 1999; Källén *et al.*, 2011).

The aim of this study is to systematically review and meta-analyze the published studies on the association between COH for IVF and risk of ovarian, endometrial and cervical cancers. Furthermore, we attempted to disentangle the confounding effect of infertility through subanalyses on studies using infertile women as the reference group, as contrasted to those using general population reference groups, after adjustment for meaningful available confounding factors. RCTs on this topic have not been performed for ethical reasons; hence, the review is by necessity restrained solely to non-randomized study designs.

## Methods

This systematic review was conducted in accordance with the PRISMA guidelines (Liberati *et al.*, 2009) and in line with the *a priori* protocol agreed by all authors.

## Search strategy for the identification of studies

A broad range search strategy was developed for Ovid Medline (Supplementary data, Fig. S1), with no language or study design restrictions and a search period running from 1966 to May 2012. Reference lists of relevant articles were hand searched for potentially eligible studies ('snowball' procedure). The National Institute of Clinical Excellence (NICE) fertility assessment and treatment guidelines (NICE, 2004) were also hand searched. Relevant 'Letters to the Editor' on previously published or unpublished series were examined for potentially useable data and/or information.

Study authors were contacted, in most cases successfully, for methodological clarifications—especially regarding duplicate cohorts—and retrieval of missing data.

## Study Eligibility

Studies comparing the risk of ovarian, endometrial or cervical cancers among women undergoing all regimens and COH protocols for IVF using the general population or infertile women as reference populations were considered in this systematic review.

We excluded case series and case reports, *in vitro* and animal studies, and studies exclusively assessing the treatment of cancer or fertility preservation after cancer treatment. Whole studies or subpopulations of studies reporting on benign or borderline tumors were not included; indeed, published results regarding borderline tumors of the ovary in association with ART exposure may well differ from those presented herein. Additionally, studies of ovarian stimulation for ovulation induction for sexual intercourse or intrauterine insemination and not for IVF were also excluded, as the protocol of treatment in these cases is different from that used in IVF (lack of GnRH agonist or antagonist use and usually lower doses of gonadotrophins).

## Data extraction

Three authors (P.K., T.N.S. and M.T.) designed and pilot-tested an *ad hoc* developed excel sheet for data extraction, which was eventually approved by the authors' team.

Collected data included general information (title, author, year, journal, geographical and clinical setting), study characteristics (design, follow-up, inclusions/exclusions), participants' characteristics [age, ascertainment of exposure and outcome, dose and protocol of IVF, histology, type of infertility, stimulation drugs before IVF, matching factors (if applicable)] and results, i.e. number of participants, reference population, odds ratio (OR), hazard ratio (HR), standardized incidence ratio (SIR), incidence rate ratio (IRR) as reported, and associated raw data for re-calculation (data checking) or *de novo* estimation of missing measures by our team, and any multivariate analyses adjustment factors (if applicable).

Eight authors (C.S., T.N.S., P.K., M.T., M.S., I.M., T.P. and A.S.), in pairs, performed the primary evaluation of titles and abstracts identified through the search and provided the list of potentially eligible studies; two authors (C.S. and P.K.) performed the final selection of the potential eligible studies of this review. Each author extracted the data independently from their pair author, using the agreed data extraction excel form. If multiple publications using the same cohort were identified, the most recent or more complete publication was used for data extraction but information from all relevant publications was used if required. Disagreements were resolved by team consensus.

## Assessment of quality of included studies

Based on the extracted data, the quality of the included studies was evaluated using the nine-item Newcastle-Ottawa Quality scale, a widely used tool for the quality assessment of observational/non-randomized studies

(Wells et al., 2011). With respect to whether the follow-up was enough for outcomes to occur, the minimum follow-up of the exposed group was set at 10 years, given that ovarian and endometrial cancers reach their peak incidence after 55 years of age (Adami et al., 2008) and IVF exposure occurs, as a rule, during the later part of the reproductive years. Concerning completeness of the follow-up, a cut-off level of women lost during the follow-up was set at 10%. Regarding the item 'demonstration that outcome of interest was not present at start of study', studies excluding cancer cases occurring during the first year of follow-up were considered to fulfil this baseline assumption.

## Assessment of risk of bias across studies

The intention was to assess publication bias across studies separately by cancer type (ovarian and endometrial cervical) using Egger's formal statistical test (Egger et al., 1997) at the 90% level. However, the number of included studies per cancer type (< 10 in all analyses) was small; additionally this test is known to have low power even when there is an adequate number of studies in the meta-analysis. Hence, in the absence of a robust formal test, no testing for publication bias was carried out.

## Data synthesis

The effect estimates that were extracted, if available, or *de novo* calculated from available data, were SIRs, IRRs, HRs and ORs. SIRs were estimated as the ratio of the observed over expected number of cases for exposed women. The 95% confidence interval (CI) for  $\log(\text{SIR})$  was constructed via the term  $\pm 1.96/[\text{square root}(O)]$ , where  $O$  was the observed number of events (Alder et al., 2006). IRRs and their 95% CIs were estimated from the number of incident cases and person-years for exposed and unexposed women, using the `epitab` STATA commands (StataCorp, 2009). Maximally adjusted effect estimates (ORs and HRs) were additionally extracted on the total of the sample, wherever possible. All analyses were carried out and reported separately for each type of cancer (ovarian, endometrial and cervical).

Since the absolute risk of endometrial, ovarian or cervical cancer is low, the four measures of association are expected to yield similar estimates of relative risk (RR). Consequently, we presented all RR estimates pooled together, as appropriate, so that comprehensiveness of the analysis and maximization of the statistical power are ensured (Larsson et al., 2007; Adami et al., 2008). Results are always shown as subgroup analyses by reference population (general or infertile population), the latter allowing control for the confounding effect of infertility *per se*. In addition, subanalyses are presented by type of effect measure (SIRs and ORs) within the subgroup of studies treating the general population as the reference. On the contrary, regarding studies treating infertile women as the reference group, no further subanalyses (on HRs and IRRs) are presented, as subgroups contained only one study, in all cases.

Meta-analysis was carried out using the STATA `metan` command. Fixed (Mantel-Haenszel) or random effects (DerSimonian-Laird) models were used to calculate pooled effect estimates. Between-study heterogeneity was assessed by using Cochran Q statistic (significance level at  $P < 0.1$ ) and by estimating  $I^2$ . In case of significant heterogeneity, irrespective of the  $I^2$  estimation, random effects models were employed to allow for it (Higgins and Green, 2011).

Some of the included studies reported separately data including or excluding incident cases diagnosed during the first year of follow-up. When available, both sets of data were utilized to perform analyses of effect estimates so as to make the distinction between causal effects and tumor-promoting effects, the latter reflected mainly upon incident cases presenting during the first year of follow-up.

Our initial purpose was to carry out subgroup analyses according to the number of cycles of IVF, histological type of cancer, age group, pregnancy

occurrence, type of subfertility, agent and protocol used for COH, as well as across strata of confounders. Respective data were either insufficient or unavailable in the included studies hence the planned subgroup analyses could not be carried out.

The statistical analysis was independently performed by two groups (TNS/PK in Athens and MT in Oxford), using STATA Software (STATA Corporation, College Station, TX, USA). Disagreements were again resolved by team consensus.

## Results

### Results of the search strategy

The search algorithm yielded 7785 records; of them, 7722 were excluded as irrelevant on the basis of title and abstract. The full text article of the remaining 63 studies was obtained and assessed according to the eligibility criteria. Fifty studies were excluded with reasons (Althuis et al., 2005a, b; Benschushan et al., 2001; Chene et al., 2009; Croughan et al., 2001; Cusidó et al., 2007; Doyle et al., 2002; Franceschi et al., 1994; Gocze et al., 2000; Goodman et al., 2001; Harlow et al., 1988; Joly et al., 1974; Kelsey et al., 1982; La Vecchia et al., 1985; Lopes et al., 1993; Modan et al., 1998; Mosgaard et al., 1997, 1998; Nieto et al., 2001; Parazzini et al., 1997, 2001a, b, 2010; Potashnik et al., 1999; Purdie et al., 1995; Risch et al., 1996; Rodriguez et al., 1998; Rossing et al., 1996, 2004; Sanner et al., 2009; Senö et al., 1996; Shapiro, 1995; Shu et al., 1989; Shushan et al., 1996; Silva Idos et al., 2009; Unkila-Kallio et al., 1997, 1998, 2000; Vlahos, 1998; Willemsen et al., 1993), as shown in Supplementary data, Table S1. Another four (Venn et al., 2001a, b; Källén et al., 2005; Finnström et al., 2011) were excluded because of overlapping data with already included studies, leaving a total of nine studies for this meta-analysis (Venn et al., 1995, 1999; Dor et al., 2002; Klip et al., 2002; Lerner-Geva et al., 2003; Kristiansson et al., 2007; Källén et al., 2011; van Leeuwen et al., 2011; Yli-Kuha et al., 2012). Details of the study selection process, including a PRISMA flow chart, are presented in Fig. 1.

Several of the included studies comprised data for more than one type of cancer; data on ovarian cancer were available in six studies (Venn et al., 1999; Dor et al., 2002; Lerner-Geva et al., 2003; Källén et al., 2011; van Leeuwen et al., 2011; Yli-Kuha et al., 2012) five on endometrial (Venn et al., 1999; Dor et al., 2002; Klip et al., 2002; Kristiansson et al., 2007; Yli-Kuha et al., 2012) and another five on cervical cancer (Venn et al., 1995; Dor et al., 2002; Lerner-Geva et al., 2003; Källén et al., 2011; Yli-Kuha et al., 2012).

The selected nine studies (Table I) included a total cohort size of 109 969 women exposed to IVF, two of which were performed in Australia (Venn et al., 1995, 1999), two in Israel (Dor et al., 2002; Lerner-Geva et al., 2003), two in the Netherlands (Klip et al., 2002; van Leeuwen et al., 2011), two in Sweden (Kristiansson et al., 2007; Källén et al., 2011) and one in Finland (Yli-Kuha et al., 2012), yielding 76 incident cases of ovarian, 18 of endometrial and 207 of cervical cancer.

All studies reported comparisons versus the general population, whereas comparisons versus infertile women were directly or indirectly presented in four studies (Venn et al., 1995, 1999; Klip et al., 2002; van Leeuwen et al., 2011). The distinction between the two follow-up intervals (total follow-up or excluding first year after IVF) was made in

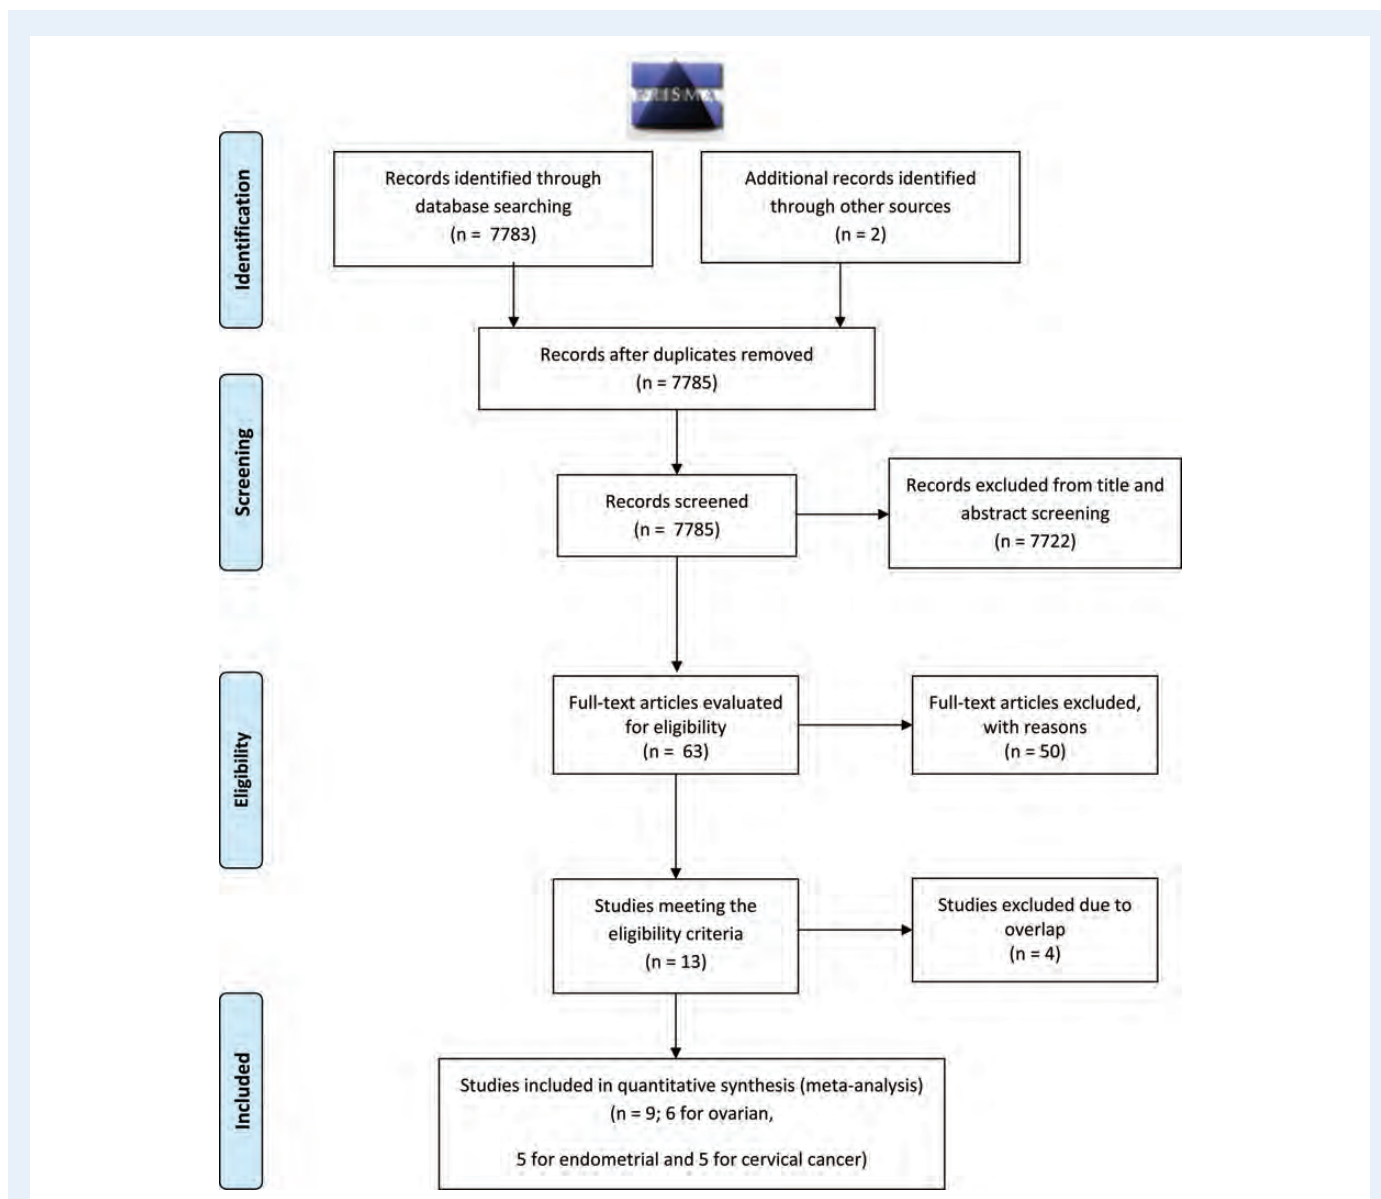

**Figure 1** Prisma flowchart.

three studies (Lerner-Geva *et al.*, 2003; van Leeuwen *et al.*, 2011; Yli-Kuha *et al.*, 2012).

### Quality of included studies

Rating of the quality of studies according to the Newcastle–Ottawa score is presented in the Supplementary data, Table SII, while the PRISMA Checklist in the Supplementary data, Table SIII. Quality scores ranged between 5 and 9. For all included studies bar one (van Leeuwen *et al.*, 2011) the follow-up time for exposed women was not long enough (<10 years). While nearly all studies ensured the comparability by adjusting/matching on age, only three of them (Källén *et al.*, 2011; van Leeuwen *et al.*, 2011; Yli-Kuha *et al.*, 2012) ensured the comparability for additional factors, i.e. also adjusting for year of delivery and smoking (Källén *et al.*, 2011), frequency matching on subfertility diagnoses and adjusting for endometriosis (van Leeuwen *et al.*, 2011), matching on residence as well as adjusting

for marital status and socioeconomic position (Yli-Kuha *et al.*, 2012). Lastly, frequency matching was used to control for subfertility diagnoses and adjustment for endometriosis.

### Analyses by cancer type

The results of all analyses performed to address the question of a putative increased risk for specific cancer types after COH for IVF, as well as those of *a priori* defined subgroup analyses, are presented below and in Table II, by cancer type.

#### Ovarian cancer

The synthesis of studies preferring effect estimates which excluded the first year of follow-up after IVF is presented in Table II. Studies with the general population as the reference group pointed to a statistically significant association between IVF and increased ovarian cancer risk (pooled effect estimate = 1.50, 95% CI: 1.17–1.92, fixed effects,

**Table 1** Characteristics of included studies of the impact of controlled ovarian hyperstimulation for IVF on ovarian, endometrial and cervical cancer.

| Study publication          | Country, region                 | Study period (including follow-up) | Cancer site <sup>a</sup>                                 | Cohort size | Total number of exposed women | Number of incident cases combined [ovarian; endometrial; cervical] | Number of exposed cases (ovarian; endometrial; cervical) | Mean follow-up in total cohort (years) | Mean follow-up in exposed women (years) | Study protocol for IVF                                                                                     | Effect estimates                           | Reference group    | Adjusting factors                                      | Excludes first year of follow-up |
|----------------------------|---------------------------------|------------------------------------|----------------------------------------------------------|-------------|-------------------------------|--------------------------------------------------------------------|----------------------------------------------------------|----------------------------------------|-----------------------------------------|------------------------------------------------------------------------------------------------------------|--------------------------------------------|--------------------|--------------------------------------------------------|----------------------------------|
| Dor et al. (2002)          | Israel (Tel Hashomer, Tel Aviv) | 1981–1996                          | Ovary<br>Endometrium<br>Cervix                           | 5026        | 5026                          | 1; 2; 1                                                            | 1; 2; 1                                                  | 3.6                                    | 3.6                                     | 1. CC/hMG, FSH, LH<br>2. hMG<br>3. GnRH-agonist/hMG                                                        | SIR                                        | General population | None                                                   | Yes                              |
| Källén et al. (2011)       | Sweden (All IVF clinics)        | 1982–2006                          | Ovary<br>Endometrium <sup>a</sup><br>Cervix              | 1 388 371   | 23 192                        | 1779; NA; 33 538 <sup>b</sup>                                      | 26; NA; 164 <sup>b</sup>                                 | NR                                     | 8.3                                     | NR                                                                                                         | OR                                         | General population | year of delivery, maternal age at delivery and smoking | No                               |
| Klip et al. (2002)         | Netherlands (12 clinics)        | 1980–1997                          | Ovary <sup>a</sup><br>Endometrium                        | 23 592      | 17 485                        | NA; 6; NA                                                          | NA; 6; NA                                                | 5.7                                    | 5.4                                     | NR                                                                                                         | SIR <sup>c</sup> , HR <sup>d</sup>         | Both               | HR: age at end of follow up                            | No                               |
| Kristiansson et al. (2007) | Sweden                          | 1981–2001                          | Ovary <sup>a</sup><br>Endometrium<br>Cervix <sup>a</sup> | 6 47 704    | 8716                          | NA; 79; NA                                                         | NA; 1; NA                                                | 11.5                                   | 6.4                                     | Classic IVF/ICSI cycles<br>Ovum transfer in a natural cycle or frozen–thawed embryo transfer were excluded | IRR (calc)                                 | General population | None                                                   | No                               |
| Lerner-Geva et al. (2003)  | Israel (Tel Aviv)               | 1984–1996                          | Ovary<br>Cervix                                          | 1082        | 1082                          | 3; NA; 3 (3; NA; 1)                                                | 3; NA; 3 (3; NA; 1)                                      | 6.5                                    | 6.5                                     | NR                                                                                                         | SIR                                        | General population | None                                                   | Both                             |
| van Leeuwen et al. (2011)  | Netherlands (12 clinics)        | 1983–2007                          | Ovary                                                    | 25 152      | 19 146                        | 42; NA; NA (37; NA; NA)                                            | 30; NA; NA (28; NA; NA)                                  | 14.8                                   | 14.3                                    | Until 1989: CC/hMG FSH/hMG<br>After 1990: GnRH-a/FSH                                                       | SIR <sup>c</sup> , HR <sup>d</sup>         | Both               | HR: age at end of follow-up, endometriosis             | Both                             |
| Venn et al. (1999)         | Australia (10 IVF clinics)      | 1978–1996                          | Ovary<br>Endometrium<br>Cervix <sup>a</sup>              | 29 700      | 20 583                        | 13; 12; NA                                                         | 7; 5; NA                                                 | 8.5                                    | 7.0                                     | CC<br>CC/HMG<br>HMG<br>HMG/<br>GnRH-agonist                                                                | SIR <sup>c</sup> , IRR <sup>d</sup> (calc) | Both               | None                                                   | No                               |
| Venn et al. (1995)         | Australia (Melbourne)           | 1978–1993                          | Ovary <sup>a</sup><br>Endometrium <sup>a</sup><br>Cervix | 10 358      | 5564                          | NA; NA; 6                                                          | NA; NA; 5                                                | 6.3                                    | 5.2                                     | Until 1987: CC + hMC + hCG<br>1987–1990: GnRH-a instead of CC<br>1990–1992: GnRH + hMG/FSH + hCG           | SIR <sup>c</sup> , IRR <sup>d</sup> (calc) | Both               | None                                                   | No                               |
| Yli-Kuha et al. (2012)     | Finland                         | 1996–2004                          | Ovary<br>Endometrium<br>Cervix                           | 18 350      | 9175                          | 12; 6; 101 (11; 5; 91)                                             | 9; 4; 34 (8; 4; 32)                                      | 7.8                                    | 7.8                                     | NR                                                                                                         | OR                                         | General population | Socio-economic position and marital status             | Both                             |

| Study publication          | Mean age in total cohort (years)                    | Mean age in exposed women (years)                   | Cohort characteristics                                                                                                                                                                                     | Study Protocol for IVF                                                                                     | Ascertainment of exposure                                   | Ascertainment of cancer          | Histology                                                                                                                                                       | Type of infertility                                                                                                                | Subanalyses provided                                                                                                                                                                                                        |
|----------------------------|-----------------------------------------------------|-----------------------------------------------------|------------------------------------------------------------------------------------------------------------------------------------------------------------------------------------------------------------|------------------------------------------------------------------------------------------------------------|-------------------------------------------------------------|----------------------------------|-----------------------------------------------------------------------------------------------------------------------------------------------------------------|------------------------------------------------------------------------------------------------------------------------------------|-----------------------------------------------------------------------------------------------------------------------------------------------------------------------------------------------------------------------------|
| Dor et al. (2002)          | 34.0 at first treatment<br>37.5 at end of follow-up | 34.0 at first treatment<br>37.5 at end of follow-up | Exposed: treated for subfertility and had at least 1 cycle of IVF                                                                                                                                          | 1. CC/<br>hMG,FSH,LH<br>2. hMG<br>3. GnRH-agonist/<br>hMG                                                  | Medical records                                             | Israel National Cancer Registry  | NR                                                                                                                                                              | Data only for the first Department (1254 women overall): 48.7% mechanical, 8.6% ovulatory, 19.4% male factor, 23.3% unexplained    | None                                                                                                                                                                                                                        |
| Källén et al. (2011)       | NR                                                  | 32.0 at first delivery<br>40.3 at end of follow-up  | Exposed: women who delivered an infant following IVF treatment                                                                                                                                             | NR                                                                                                         | National Board of Health and Welfare                        | Swedish Cancer Registry          | Ovary: 23% serous, 4% mucinous, 15% endometrioid, 8% clear cell, 8% granulosa cell, 31% cystadenomas, 4% thecom, 7% unspecified<br>Cervical: 78% <i>in situ</i> | NR                                                                                                                                 | None                                                                                                                                                                                                                        |
| Klip et al. (2002)         | 32.7 at first treatment<br>39.7 at end of follow-up | 33.1 at first treatment<br>38.6 at end of follow-up | Exposed: diagnosed with subfertility problems and had at least one cycle of IVF<br>Nonexposed: over 18 years old, unable to achieve conception after one or more years of frequent unprotected intercourse | NR                                                                                                         | Medical records for 53%; responded questionnaires for 66.9% | Netherlands Cancer Registry      | 50% adenocarcinoma; 16.7% adenocarcinoma with squamous metaplasia; 8.3% leiomyosarcoma; 16.7% complex mixed and stromal neoplasms; 8.3% choriocarcinoma         | Endometrial exposed: endometriosis 25%, male factor 38%, hormonal factor 13%, unexplained 13%, missing 13%, (male factor only 13%) | Year of birth, Age at first visit/treatment, Time since first visit/treatment<br>Years of follow-up (<5, ≥5), Type of subfertility, No of cycles, No of oocytes, Total HMG/FSH ampoules, Ever OHSS, Parity, Previous FD use |
| Kristiansson et al. (2007) | 26.8 at first conception leading to delivery        | 32.8 at first conception leading to delivery        | Exposed: live birth following pregnancy achieved by IVF<br>Nonexposed: live birth without such treatment                                                                                                   | Classic IVF/ICSI cycles<br>Ovum transfer in a natural cycle or frozen-thawed embryo transfer were excluded | Swedish register from all IVF clinics (1986 onwards)        | Swedish National Cancer Registry | NR                                                                                                                                                              | NR                                                                                                                                 | None                                                                                                                                                                                                                        |
| Lerner-Geva et al. (2003)  | 32.7 at first treatment<br>38.7 at end of follow-up | 32.7 at first treatment<br>38.7 at end of follow-up | Exposed: diagnosed with subfertility problems and had at least one cycle of IVF                                                                                                                            | NR                                                                                                         | Medical records                                             | Israel National Cancer Registry  | NR                                                                                                                                                              | 42.14% mechanical, 24.2% hormonal, 30.1% male, 3.5% unexplained                                                                    | None                                                                                                                                                                                                                        |

Continued

Table 1 Continued

| Study publication         | Country, region                           | Study period (including follow-up)        | Cancer site <sup>a</sup>                                                                                                                                                                                                                                                       | Cohort size                                                                                                     | Total number of exposed women                                                          | Number of incident cases combined [ovarian; endometrial; cervical]                                           | Number of exposed cases (ovarian; endometrial; cervical)                         | Mean follow-up in total cohort (years)                                                                                          | Mean follow-up in exposed women (years)                                                                                                | Study protocol for IVF | Effect estimates | Reference group | Adjusting factors | Excludes first year of follow-up |
|---------------------------|-------------------------------------------|-------------------------------------------|--------------------------------------------------------------------------------------------------------------------------------------------------------------------------------------------------------------------------------------------------------------------------------|-----------------------------------------------------------------------------------------------------------------|----------------------------------------------------------------------------------------|--------------------------------------------------------------------------------------------------------------|----------------------------------------------------------------------------------|---------------------------------------------------------------------------------------------------------------------------------|----------------------------------------------------------------------------------------------------------------------------------------|------------------------|------------------|-----------------|-------------------|----------------------------------|
| van Leeuwen et al. (2011) | 48.0 at end of follow-up                  | 47.5 at end of follow-up                  | Exposed: diagnosed with subfertility problems and had at least one cycle of IVF<br>Nonexposed: diagnosed subfertile before IVF became a routine procedure and underwent tubal surgery and/or hormonal treatments (frequency matched to distribution of subfertility diagnoses) | Until 1989: CC/hMG<br>FSH/hMG<br>After 1990: GnRH-a/FSH                                                         | IVF clinics registry (obligatory)                                                      | Netherlands Cancer Registry                                                                                  | NR                                                                               | 31.5% tubal, 10.3% endometriosis, 28.7% male factor, 6.7% unexplained, 4.8% other factors, 17.3% missing                        | Follow-up, No. of cycles, Subfertility diagnosis, Previous FD use, Parity, Total hMG/FSH ampules, No of oocytes (total, mean, maximum) |                        |                  |                 |                   |                                  |
| Venn et al. (1999)        | 30.7 at entry<br>39.9 at end of follow-up | 31.0 at entry<br>39.0 at end of follow-up | Exposed: evaluated for subfertility and had at least one IVF treatment cycle with ovarian stimulation (including stimulated cycles that were cancelled)<br>Unexposed: referred for IVF but untreated or had 'natural cycle' treatment without ovarian stimulation              | CC<br>CC/HMG<br>HMG<br>HMG/<br>GnRH-agonist                                                                     | Medical records, computerized data for four clinics                                    | State population-based Cancer Registries, National Cancer Statistics Clearing House and National Death Index | 66.6% endometrial adenocarcinomas, 16.6% stromal sarcomas, 16.6% leiomyosarcomas | 33.1% tubal, 23.6% male factor, 13.5% endometriosis, 4.0% ovarian defect, 3.2% other, 10.9% Unexplained, 11.4% missing          | No of stimulated cycles<br>Fertility drugs<br>Mean number of oocytes per stimulated cycle                                              |                        |                  |                 |                   |                                  |
| Venn et al. (1995)        | 31.5 at entry<br>38 at end of follow-up   | 32.0 at entry<br>38.0 at end of follow-up | Exposed: evaluated for subfertility and exposed to IVF<br>Unexposed: referred for IVF but untreated or had 'natural cycle' treatment without ovarian stimulation                                                                                                               | Until 1987: CC + hMC + hCG<br>1987–1990: GnRH-a instead of CC<br>1990–1992: CC<br>1990–1992: GnRH+hMG/FSH + hCG | 1978–1990 Medical records, 1990–1992 computerized records kept by Monash IVF programme | Victorian Cancer Registry (VCR), National Cancer Statistics Clearing House (NCSCH)                           | NR                                                                               | 43.4% Tubal, 23.2% male factor, 13.2% endometriosis, 6.2% ovarian disorders, 18.7% unexplained, 3.5% other causes, 8.4% missing | None                                                                                                                                   |                        |                  |                 |                   |                                  |



|                        |                         |                         |                                                                                                              |    |                                                                                          |                        |    |    |    |      |
|------------------------|-------------------------|-------------------------|--------------------------------------------------------------------------------------------------------------|----|------------------------------------------------------------------------------------------|------------------------|----|----|----|------|
| Yli-Kuha et al. (2012) | 33.5 at first treatment | 33.5 at first treatment | Exposed: received IVF (including CSI and FET); Unexposed: population register (matched by age, municipality) | NR | Identified by reimbursements for drugs or drug combinations specific to these treatments | FINISH Cancer Registry | NR | NR | NR | None |
|------------------------|-------------------------|-------------------------|--------------------------------------------------------------------------------------------------------------|----|------------------------------------------------------------------------------------------|------------------------|----|----|----|------|

OR, odds ratio; HR, hazard ratio; SIR, standardized incidence ratio; IRR, incidence rate ratio; NA, not applicable; NR, not reported. One study reported ovarian cancer only (van Leeuwen et al., 2011), one ovarian and endometrial (Klip et al., 2002), one ovarian and cervical (Lerner-Geva et al., 2003) and the rest six all three types of cancer.

<sup>a</sup>The cancer sites and the studies with an asterisk are not used in the analysis, either due to overlap or due to insufficient data provided.

<sup>b</sup>Includes *in situ*.

<sup>c</sup>Versus general population.

<sup>d</sup>Versus infertile population.

Fig. 2a), whereas in contrast, the RR estimate from the analysis treating infertile women as the reference group was far from being statistically significant (pooled effect estimate = 1.26, 95% CI: 0.62–2.55, fixed effects, Fig. 2b). Subanalyses on SIRs and ORs among studies which adopted comparison versus the general population pointed to positive associations (Supplementary data, Figs S2 and S3), although the subanalysis on SIRs did not reach formal significance (pooled effect estimate = 1.19, 95% CI: 0.86–1.64, fixed effects). The alternative approach synthesizing effect estimates derived from the total follow-up (Table II, Supplementary data, Figs S4–S7) yielded similar results as the aforementioned analyses.

### Endometrial cancer

Despite the limited number endometrial cancer cases included in the review and similarly to ovarian cancer, pooling of studies versus general population indicated a statistically significant and sizeable association between IVF and increased endometrial cancer risk (pooled effect estimate = 2.04, 95% CI: 1.22–3.43, fixed effects, Fig. 3a). In contrast, the analysis treating infertile women as the reference group clearly showed no increased risk for the disease following IVF experience (pooled effect estimate = 0.45, 95% CI: 0.18–1.14, fixed effects, Fig. 3b). For studies treating the general population as the reference category, the subanalyses on SIRs (pooled effect estimate = 1.97, CI: 1.15–3.40, fixed effects) and ORs (pooled effect estimate = 2.86, 95% CI: 0.52–15.75, fixed effects) pointed to positive associations (Supplementary data, Figs S8 and S9), although the subanalysis on ORs, based only on two studies, did not reach formal significance. The alternative approach preferring effect estimates derived from the total follow-up yielded a similar pattern of results (Table II, Supplementary data, Figs S10–S13).

### Cancer of the cervix

IVF was not associated with increased risk for cervical cancer either at the synthesis of studies versus general population (pooled effect estimate = 0.86, 95% CI: 0.49–1.49, random effects, Fig. 4a) or at the sole study treating infertile women as the reference group. Regarding the studies which adopted comparison versus the general population (Fig. 4b and Supplementary data, Fig. S14), the subanalysis on ORs pointed to an intriguing inverse association between IVF and risk of cervical cancer (pooled effect estimate = 0.60, 95% CI: 0.52–0.70, fixed effects). The alternative approach preferring effect estimates derived from the total follow-up reproduced the aforementioned set of findings (Table II, Supplementary data, Figs S15–S17).

## Discussion

The *lege artis* synthesis of all nine so far published studies on cancer risk among women undergoing COH for IVF highlight the methodologically and conceptually challenging nature of IVF as an exposure and potential risk factor in cancer epidemiology. As expected, COH for IVF does not seem to increase the risk for the non-hormone-dependent cervical cancer, whereas inconclusive results are drawn for ovarian and endometrial cancers. The notion of 'reference category' in the construction of models and comparisons leaves the statistical background and comes to the interpretational foreground, as studies adopting different reference populations, notably general population as contrasted to infertile women, yield discrepant results. Specifically, the significant and sizeable

**Table II** Results of the meta-analyses examining the association between IVF and endometrial, ovarian and cervical cancer.

|                                                                                                 | Ovarian cancer        |                                     |          |                                                             | Endometrial cancer    |                          |          |                                                             | Cervical cancer       |                               |          |                                                             |
|-------------------------------------------------------------------------------------------------|-----------------------|-------------------------------------|----------|-------------------------------------------------------------|-----------------------|--------------------------|----------|-------------------------------------------------------------|-----------------------|-------------------------------|----------|-------------------------------------------------------------|
|                                                                                                 | <i>n</i> <sup>a</sup> | Effect estimate (95% CI)            | <i>P</i> | Heterogeneity <i>I</i> <sup>2</sup> , <i>p</i> <sup>b</sup> | <i>n</i> <sup>a</sup> | Effect estimate (95% CI) | <i>P</i> | Heterogeneity <i>I</i> <sup>2</sup> , <i>p</i> <sup>b</sup> | <i>n</i> <sup>a</sup> | Effect estimate (95% CI)      | <i>P</i> | Heterogeneity <i>I</i> <sup>2</sup> , <i>p</i> <sup>b</sup> |
| Approach preferring <sup>c</sup> estimates which excluded the first year of follow-up after IVF |                       |                                     |          |                                                             |                       |                          |          |                                                             |                       |                               |          |                                                             |
| Analysis versus general population                                                              | 6                     | <b>1.50 (1.17–1.92)</b>             | 0.001    | 22.5%, 0.265                                                | 5                     | <b>2.04 (1.22–3.43)</b>  | 0.007    | 0.0%, 0.491                                                 | 5                     | 0.86 (0.49–1.49) <sup>R</sup> | 0.585    | 70.2%, 0.009                                                |
| Subanalysis on SIRs                                                                             | 4                     | 1.19 (0.86–1.64)                    | 0.293    | 0.0%, 0.679                                                 | 3                     | <b>1.97 (1.15–3.40)</b>  | 0.014    | 33.8%, 0.221                                                | 3                     | 1.54 (0.47–5.09) <sup>R</sup> | 0.480    | 64.0%, 0.062                                                |
| Subanalysis on ORs                                                                              | 2                     | <b>2.10 (1.43–3.10)</b>             | <0.001   | 0.0%, 0.918                                                 | 2                     | 2.86 (0.52–15.75)        | 0.227    | 0.0%, 0.632                                                 | 2                     | <b>0.60 (0.52–0.70)</b>       | <0.001   | 0.0%, 0.661                                                 |
| Analysis versus infertile women <sup>d</sup>                                                    | 2                     | 1.26 (0.62–2.55)                    | 0.521    | 0.0%, 0.451                                                 | 2                     | 0.45 (0.18–1.14)         | 0.093    | 0.0%, 0.789                                                 | 1                     | 5.70 (0.28–117.20)            | 0.259    | NC, NC <sup>e</sup>                                         |
| Approach preferring <sup>c</sup> estimates derived from total follow-up                         |                       |                                     |          |                                                             |                       |                          |          |                                                             |                       |                               |          |                                                             |
| Analysis versus general population                                                              | 6                     | <b>1.65 (1.07–2.55)<sup>R</sup></b> | 0.022    | 52.1%, 0.064                                                | 5                     | <b>1.97 (1.18–3.27)</b>  | 0.009    | 0.0%, 0.553                                                 | 5                     | 0.85 (0.49–1.48) <sup>R</sup> | 0.556    | 70.8%, 0.008                                                |
| Subanalysis on SIRs                                                                             | 4                     | 1.42 (0.74–2.76) <sup>R</sup>       | 0.294    | 58.1%, 0.067                                                | 3                     | <b>1.97 (1.15–3.40)</b>  | 0.014    | 33.8%, 0.221                                                | 3                     | 1.54 (0.47–5.08) <sup>R</sup> | 0.480    | 63.9%, 0.063                                                |
| Subanalysis on ORs                                                                              | 2                     | <b>2.13 (1.45–3.13)</b>             | <0.001   | 0.0%, 0.769                                                 | 2                     | 1.91 (0.46–8.04)         | 0.376    | 0.0%, 0.923                                                 | 2                     | <b>0.60 (0.52–0.70)</b>       | <0.001   | 0.0%, 0.518                                                 |
| Analysis versus infertile women <sup>d</sup>                                                    | 2                     | 1.05 (0.55–2.01)                    | 0.874    | 0.0%, 0.685                                                 | 2                     | 0.45 (0.18–1.14)         | 0.093    | 0.0%, 0.789                                                 | 1                     | 5.70 (0.28–117.20)            | 0.259    | NC, NC <sup>e</sup>                                         |

Bold cells denote statistically significant associations. All pooled effect estimates were derived from fixed-effects analyses, except for cells marked with <sup>R</sup>(random-effects).

CI, confidence interval. NC, not calculable.

<sup>a</sup>Number of studies.

<sup>b</sup>*P*-value derived from Cochran *Q* statistic.

<sup>c</sup>The distinction between the two follow-up intervals (excluding first year after IVF and total) was made only in three studies (Lerner-Geva *et al.*, 2003; van Leeuwen *et al.*, 2011; Yli-Kuha *et al.*, 2012).

<sup>d</sup>All analyses were based on IRRs.

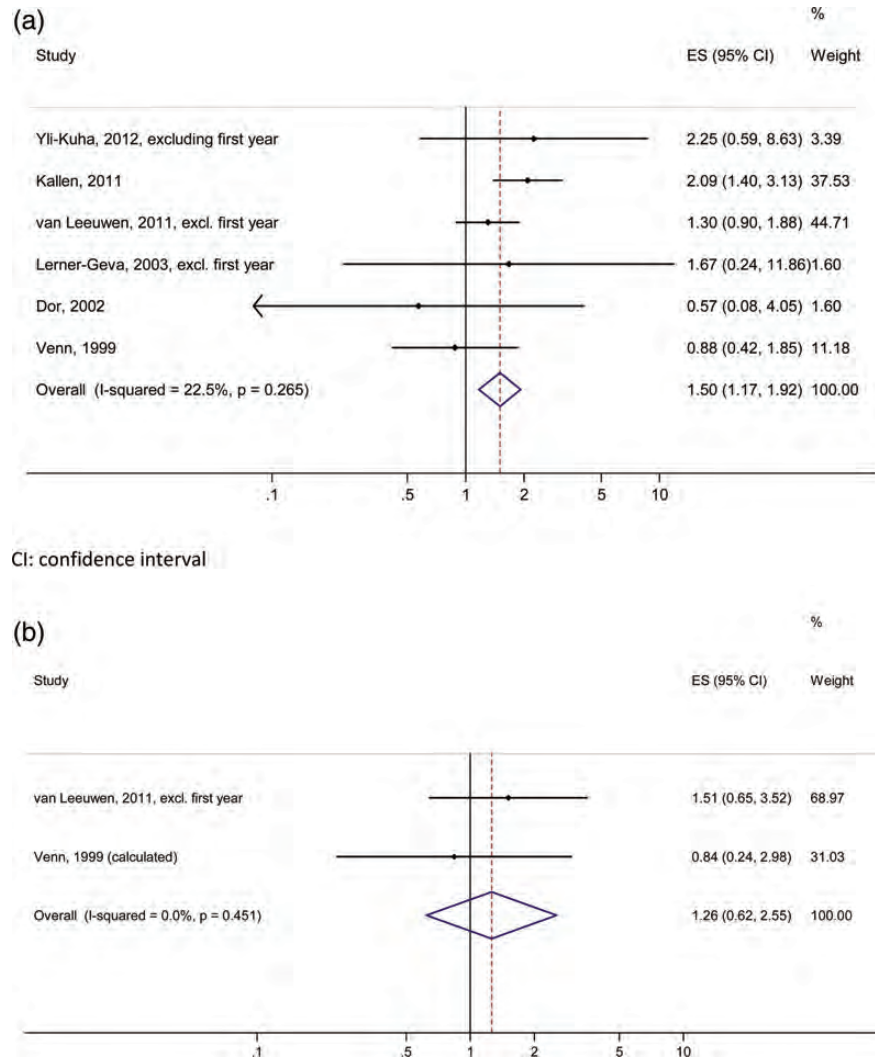

**Figure 2** (a) Forest plot presenting combined effect estimates [standardized incidence ratios (SIRs), odds ratios (ORs)] for ovarian cancer in women exposed to IVF, preferring estimates excluding the first year of follow-up after IVF. ES, effect size (relative risk). (b) Forest plot presenting incidence rate ratios (IRRs) for ovarian cancer in women exposed to IVF versus infertile women, preferring estimates excluding the first year of follow-up after IVF.

associations with ovarian and endometrial cancers were not maintained when infertile population was used as the reference, essentially confirming the role of infertility as a confounding factor in the risk of developing gynaecological cancers. Overall, the associations examined in this meta-analysis should be interpreted with caution owing to the small number of available studies in the literature, imperfections of exposure data, lack of adjustment for meaningful confounders in the included studies and relatively short follow-up periods.

The importance of infertility as a risk factor for gynecological cancer (Cetin *et al.*, 2008) clearly emerged in this meta-analysis. Indeed, the pooled effect estimates derived from the analyses treating infertile women as the reference group seems to yield a clearer picture of the role mediated by IVF, as they are supposedly free from any superimposed confounding effects of infertility. However, there seems to be further room for methodological improvement in the individual studies, as adjusted effect estimates were provided only in one out of the two included studies (van Leeuwen *et al.*, 2011); the IRRs

derived from the other one (Venn *et al.*, 1999) were crude (unadjusted), not allowing the examination of the contribution of other potential risk factors.

In order to gain insight into possible tumor-promoting effects, as well as into the possibility of diagnostic access bias, we have followed an alternative approach excluding cancer cases emerging in the first year after IVF treatment. Indeed, several reports have endorsed an increased incidence within this time window of exposure to IVF drugs, whereas the hormonal changes enhanced by respective medication and the close medical surveillance of women before, during and after each cycle have been considered to contribute to the early detection of gynecological cancers (Venn *et al.*, 1995, 2001a, b; Dor *et al.*, 2002; Lerner-Geva *et al.*, 2003). Of note, our alternative approach yielded essentially the same pattern of results as the analysis based on the total follow-up period, findings that designated a slender role of events recorded within the first year. Nevertheless, it should be stressed that only three (Lerner-Geva *et al.*, 2003; van

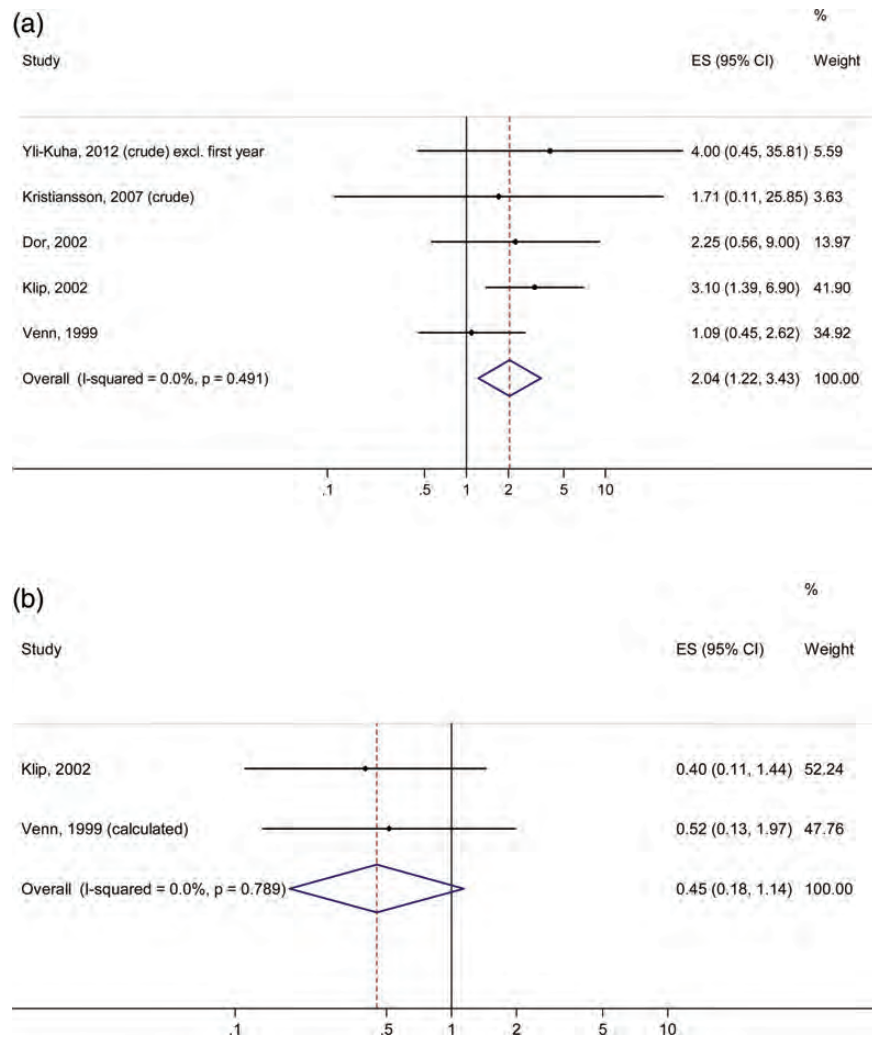

**Figure 3** (a) Forest plot presenting combined effect estimates (SIRs, ORs) for endometrial cancer in women exposed to IVF, preferring estimates excluding the first year of follow-up after IVF. (b) Forest plot presenting IRRs for endometrial cancer in women exposed to IVF versus infertile women, preferring estimates excluding the first year of follow-up after IVF.

Leeuwen *et al.*, 2011; Yli-Kuha *et al.*, 2012) of the nine included studies made the distinction, while the total number of observed cancer cases (especially endometrial cancer cases) was small; consequently, the observed differentiation of results may have been blunted, to a certain extent.

Pooling of SIRs and ORs was undertaken in the analysis of studies treating the general population as the reference group, given their asymptotic convergence to RR assuming the rarity of the outcome variable (Larsson *et al.*, 2007). The significant results noted for the ovarian and endometrial cancers SIRs (four and three studies, respectively) and ORs (two studies for each cancer type) subgroup analyses should be interpreted with caution owing to the small number of studies in the analysis. Regarding cervical cancer, the subanalysis on ORs pointed to a rather inverse association, namely a protective role of IVF. As a rule, women who seek IVF are considered to have stable sexual relations and hence could be at a low risk for this type of cancer; surprisingly, however, a recent study (van Hamont *et al.*,

2006) reported that women undergoing IVF are diagnosed with a high-grade cervical lesion almost twice as frequently compared with women in the general population. It should thus be kept in mind that the inverse association between IVF and cervical cancer may well be prone to confounding and diagnostic access bias, as IVF women may be treated for cervical lesions prior to the development of cervical cancer. Regarding confounding, parity (International Collaboration of Epidemiological Studies of Cervical Cancer, 2006) and socioeconomic status (SES) (Parikh *et al.*, 2003) are interwoven and thus have been associated with decreased cervical cancer risk; women undergoing IVF may well be privileged in terms of both factors. Noticeably, neither of the two studies in this subanalysis adjusted for both factors; Yli-Kuha *et al.* (2012) adjusted for SES, whereas Källén *et al.* (2011) restricted their analysis to women who gave birth without adjustment for SES.

The use of ovarian stimulation drugs prior to IVF might also be a confounding factor but data provided in the studies under analysis

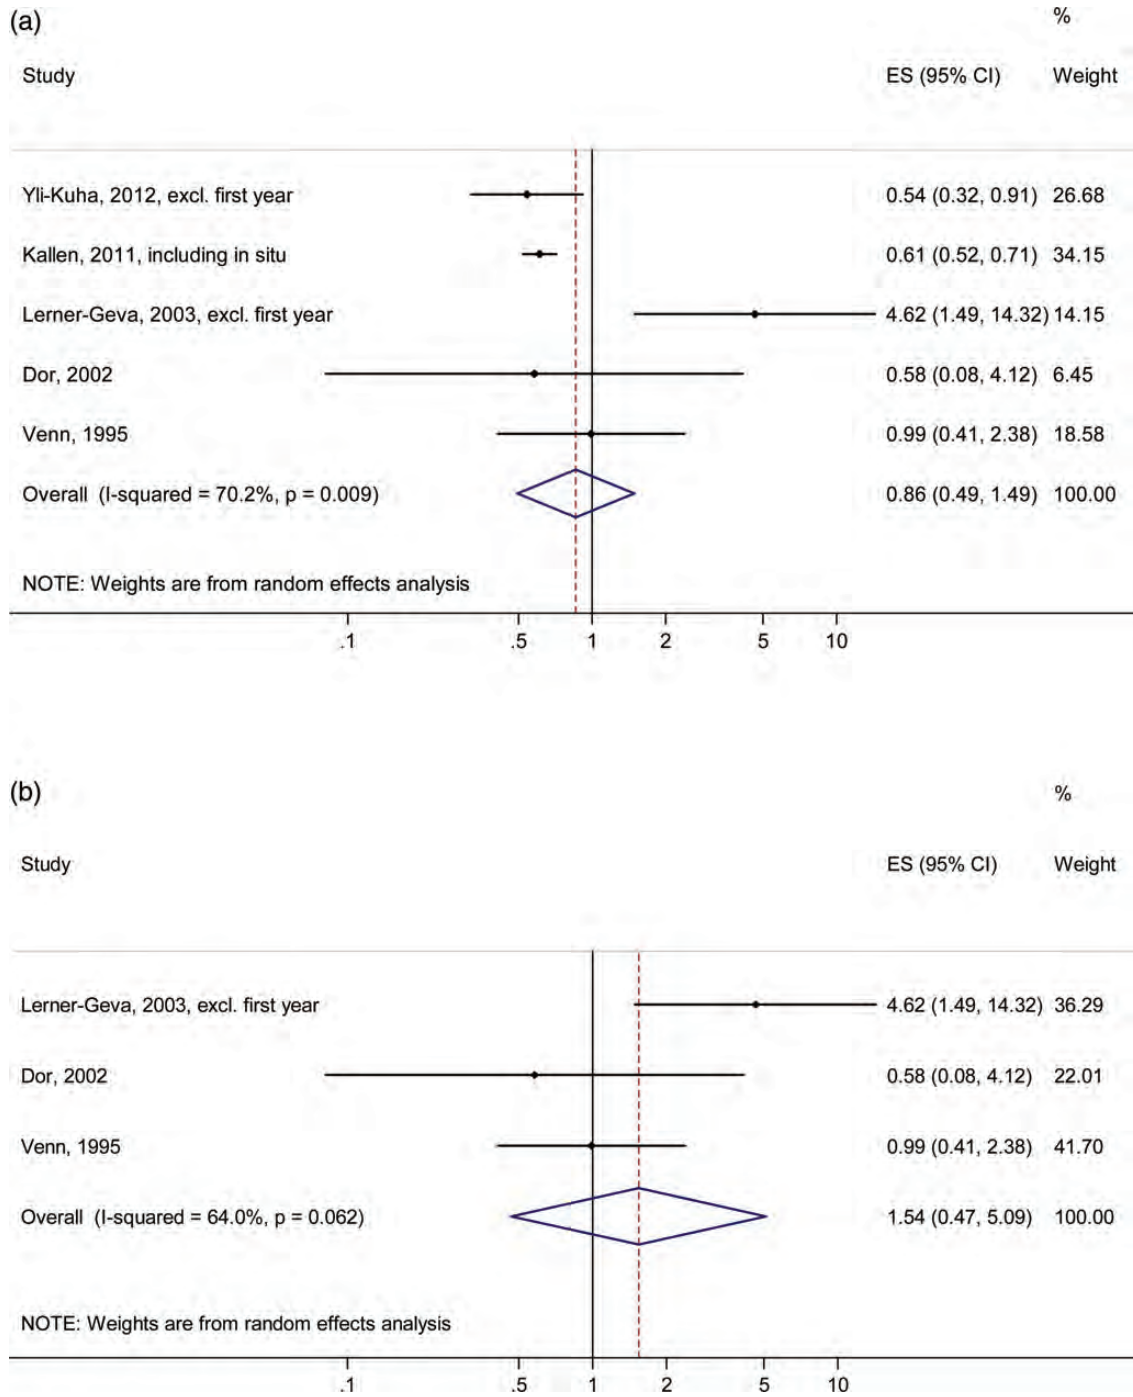

**Figure 4** (a) Forest plot presenting combined effect estimates (SIRs, ORs) for cervical cancer in women exposed to IVF, preferring estimates excluding the first year of follow-up after IVF. (b) Forest plot presenting SIRs for cervical cancer in women exposed to IVF versus general population, preferring estimates excluding the first year of follow-up after IVF.

were rather scarce and incomplete to allow proper examination of their impact. The results of the current meta analysis are, however, in line with the evidence coming from previous reviews on ovarian stimulation drugs; most found no relationship between medication and ovarian (Ness *et al.*, 2002; Venn *et al.*, 2003; Kashyap *et al.*, 2004; Brinton *et al.*, 2005; Kanakas and Mantzavinos, 2006; Mahdavi *et al.*, 2006; Brinton, 2007; Källén, 2008; Devesa *et al.*, 2010; Lerner-

Geva *et al.*, 2010; Vlahos *et al.*, 2010a, b; Impicciatore and Tiboni, 2011) or endometrial cancer (Kanakas and Mantzavinos, 2006; Brinton, 2007; Källén, 2008; Vlahos *et al.*, 2010a), whereas in other studies the results were inconclusive (Meirow and Schenker, 1996; Glud *et al.*, 1998; Ayhan *et al.*, 2004; Zreik *et al.*, 2008; Lerner-Geva *et al.*, 2010; Impicciatore and Tiboni, 2011). In two studies a direct relationship was attributed (Whittemore *et al.*, 1992; Bukovic *et al.*,

2011), triggering the prevailing uncertainty. Lastly, a meta-analysis of seven case-control and three cohort studies, showed a trend towards an ovarian cancer risk-lowering benefit of ovulation-induction drugs, showing that infertile women themselves may gain even more from ART than the expected reproductive benefits (Kashyap et al., 2004).

Numerous published reports point out the weaknesses of individual findings and consequently recommend the development of studies capturing larger populations and longer follow-ups, relying on more precise data with better adjustments for confounding factors (Del Priore et al., 1995; Burmeister and Healy, 1998; Klip et al., 2000; Gad-ducci et al., 2004; Cetin et al., 2008; Jensen et al., 2008; Dauplat et al., 2009; Webb, 2009). Others suggest the inclusion as the control group of subfertile women who have indication to use respective drugs but were eventually not treated (Venn et al., 1995; Klip et al., 2000; Kashyap et al., 2004; Jensen et al., 2008; Calderon-Margalit et al., 2009), or comparisons between IVF or non-IVF treated women who have given birth (Källén, 2008); alternatively, there are suggestions for investigation of the possible carcinogenic effects of these drugs in certain subgroups, e.g. infertile women who do not subsequently get pregnant, or to focus on certain histological subtypes—as there may exist different risk factors (Glud et al., 1998; Kashyap et al., 2004; Mahdavi et al., 2006; Soegaard et al., 2007); or those with genetic predisposition, PCOS and endometriosis (Meirow and Schenker, 1996; Zreik et al., 2008). Lastly, short courses of ovarian stimulation (Crosbie and Menon, 2005; Zreik et al., 2008) are proposed in order to monitor for cancer development (during the initial infertility work-up (Zreik et al., 2008)). The ultimate goal of these suggestions is to come up with sound estimates enabling proper consultation by specialists of subfertile couples seeking IVF, as the latter seem to increasingly turn for advice to both the Internet and health providers.

The inherent limitations of the included studies are reflected in the current meta-analysis. A major, unavoidable shortcoming pertained to the short follow-up periods, reflected in the quality ratings of included studies. Indeed, only one study (van Leeuwen et al., 2011) has provided follow-up longer than 10 years for the exposed group; longer follow-up periods seem indispensable, as both ovarian and endometrial cancers reach their peak incidence after the age of 55 years (Adami et al., 2008), whereas IVF exposure occurs mostly during the late reproductive years.

A plethora of records (over 7000) were retrieved in our initial search, which resulted, however, in a paucity of the studies ( $n = 9$ ) eligible for inclusion in the meta-analysis. By necessity, studies examining ovulation stimulation and/or ART in general were excluded; this could be considered an advantage, however, as ovulation stimulation or induction may have a different impact on cancer incidence, compared with IVF alone. Repeated attempts to communicate with the authors of respective papers, in the case of questionable IVF reporting or other data and details on the eligibility for inclusion, were not always successful and as a result valuable data from large studies were excluded. This was the case, for example, with a cohort (Jensen et al., 2009a,b) on >50 000 infertile women suffering endometrial or ovarian cancer following the use of infertility drugs; the authors did not specifically assess COH for IVF but concluded that use of gonadotrophins and more than six cycles of clomiphene citrate (and not GnRH analogs) increased the uterine cancer risk,

observed after 10 years of follow-up, findings that were not changed when results were stratified by parity status or adjusted for infertility or use of oral contraceptives. In a similar context, another fundamental reporting problem was that missing information limited our ability to explore a relationship between COH medications and cancer with regard to type, protocol, dose used and number of cycles of IVF, type of subfertility, histological type of cancer, age group and pregnancy occurrence, despite our initial intention; for instance, age-related differential effects of IVF which have been supported in the context of breast cancer (Stewart et al., 2012) could not be examined in our meta-analysis. Lastly, IRRs among infertile women were based on crude estimates, whereas several studies used SIRs, which compare the number of observed cancers in the study cohort of interest to the number expected based on rates met in the general population. SIRs inherently correspond to RR estimates adjusted only for age and calendar time (Jensen et al., 2008), usually leading to overestimation of cancer risk (Klip et al., 2000; Mahdavi et al., 2006; Jensen et al., 2008). More elaborate approaches, for example exploring the cancer risk among IVF women as contrasted to that among other women *who had already given birth* in order to control for the effect of pregnancy itself on cancer risk (Källén et al., 2005) were relatively rare.

Notwithstanding these limitations, this systematic review with clear definitions of exposures (COH for IVF) and outcomes, no language restriction and adherence to procedures that maximize the potential to avoid extraction, recording, conformity and retrieval bias and control for the impact of infertility, provides a valuable summary of the results of scientific publications so far. Moreover, the review identifies pivotal study design and reporting elements that should be considered in future studies, so that further light can be shed on the thus far inconclusive scientific evidence. In particular, whereas population-based cohort studies provide estimates of the combined burden due to infertility, COH and IVF, special caution should be devoted in the design of studies aiming to disentangle the tentative increase in risk on account of IVF alone, by specific type of infertility. To this end, linkage studies with accurate and detailed IVF registered exposure data and cancer outcomes particularly among infertile women, controlling for known confounding factors, such as parity and SES, seem warranted.

Issues for clarification also include the possibility that pregnancy itself, even after IVF, may outweigh a possible risk on account of the medication used and eventually exert, via the subsequent pregnancy, a higher protective effect against cancer of the ovary and endometrium. On the other hand, the level of risk for women who continue to remain infertile despite the larger doses and/or longer durations of drugs they have received during this treatment remains to be assessed in future studies.

In summing up the results of published studies, IVF is not associated with elevated cervical cancer risk; nor seems to be associated with ovarian or endometrial cancer when the confounding effect of infertility is taken into account. Future cohort studies, however, properly designed to disentangle the sole effect of IVF should preferably use infertile women as the reference group, rely on IVF-registered valid exposure data, adjust for a variety of meaningful confounders and adopt relatively longer follow-up periods before sound conclusions are drawn. Thus, it may take some time before new epidemiological studies and consequent systematic reviews and meta-analyses can

amass the follow-up times required to fully address long-term effects of IVF on gynecological cancer risk.

## Supplementary data

Supplementary data are available at <http://humupd.oxfordjournals.org/>.

## Acknowledgements

We would like to thank Dr Asher Shushan, Dr Carlo La Vecchia, Dr Louise Brinton, and Dr Michelle Althuis for their feedback regarding the lack of data availability in their databases; Dr Liat Lerner-Geva for her reply regarding potential overlap between studies; and Dr Allan Jensen for his kind explanation concerning his denial to provide data. This work was partially supported by the National and Kapodistrian University of Athens.

## Authors' roles

S.C. contributed to study design, critical evaluation of the studies, extraction of data and interpretation of the findings, drafted the article, gave final approval of the version to be published and secured the invited review. S.T.N. contributed to study design, critical evaluation of the studies, extraction and interpretation of data, performed statistical analysis, drafted the article and gave final approval of the version to be published. K.P. contributed to study design, critical evaluation of the studies, extraction and interpretation of data, performed statistical analysis, drafted the article and gave final approval of the version to be published. T.M. contributed to study design, critical evaluation of the studies, extraction and interpretation of data, performed statistical analysis, drafted the article and gave final approval of the version to be published. S.M. contributed to the critical evaluation of the studies, extraction and interpretation of data, revised the article critically for important intellectual content and gave final approval of the version to be published. M.I. contributed to the critical evaluation of the studies, extraction and interpretation of data, revised the article critically for important intellectual content and gave final approval of the version to be published. P.T. contributed to study design, critical evaluation of the studies, extraction and interpretation of data, drafted the article and gave final approval of the version to be published. S.A. contributed to study design, critical evaluation of the studies, extraction and interpretation of data, drafted the article and gave final approval of the version to be published. P.E.T. conceived the idea of the study, contributed to study design, critical evaluation of the studies, extraction and interpretation of data, performed statistical analysis, drafted the article, gave final approval of the version to be published and will act as a guarantor of the study.

## Funding

No external funding was either sought or obtained for this study.

## Conflict of interest

None declared.

## References

- Adami HO, Hsieh CC, Lambe M, Trichopoulos D, Leon D, Persson I, Ekblom A, Janson PO. Parity, age at first childbirth, and risk of ovarian cancer. *Lancet* 1994;**344**:1250–1254.
- Adami HO, Hunter D, Trichopoulos D. *Textbook of Cancer Epidemiology*. NY: Oxford University Press, 2008.
- Ahmed FY, Wiltshaw E, A'Hern RP, Nicol B, Shepherd J, Blake P, Fisher C, Gore ME. Natural history and prognosis of untreated stage I epithelial ovarian carcinoma. *J Clin Oncol* 1996;**14**:2968–2975.
- Akhmedkhanov A, Toniolo P, Zeleniuch-Jacquotte A, Pettersson KS, Huhtaniemi IT. Luteinizing hormone, its beta-subunit variant, and epithelial ovarian cancer: the gonadotropin hypothesis revisited. *Am J Epidemiol* 2001a;**154**:43–49.
- Akhmedkhanov A, Zeleniuch-Jacquotte A, Toniolo P. Role of exogenous and endogenous hormones in endometrial cancer: review of the evidence and research perspectives. *Ann N Y Acad Sci* 2001b;**943**:296–315.
- Alder N, Fenty J, Warren F, Sutton AJ, Rushton L, Jones DR, Abrams KR. Meta-analysis of mortality and cancer incidence among workers in the synthetic rubber-producing industry. *Am J Epidemiol* 2006;**164**:405–420.
- Althuis MD, Moghissi KS, Westhoff CL, Scoccia B, Lamb EJ, Lubin JH, Brinton LA. Uterine cancer after use of clomiphene citrate to induce ovulation. *Am J Epidemiol* 2005a;**161**:607–615.
- Althuis MD, Scoccia B, Lamb EJ, Moghissi KS, Westhoff CL, Mabie JE, Brinton LA. Melanoma, thyroid, cervical, and colon cancer risk after use of fertility drugs. *Am J Obstet Gynecol* 2005b;**193**:668–674.
- Ayhan A, Salman MC, Celik H, Dursun P, Ozyuncu O, Gultekin M. Association between fertility drugs and gynecologic cancers, breast cancer, and childhood cancers. *Acta Obstet Gynecol Scand* 2004;**83**:1104–1111.
- Bai W, Oliveros-Saunders B, Wang Q, Acevedo-Duncan ME, Nicosia SV. Estrogen stimulation of ovarian surface epithelial cell proliferation. *In Vitro Cell Dev Biol Anim* 2000;**36**:657–666.
- Balen A. The effects of ovulation induction with gonadotrophins on the ovary and uterus and implications for assisted reproduction. *Hum Reprod* 1995;**10**:2233–2237.
- Bamberger AM, Bamberger CM, Schulte HM. Molecular mechanisms of proliferation in endometrial tumour cells. *Hum Reprod Update* 1998;**4**:526–531.
- Basille C, Olivennes F, Le Calvez J, Beron-Gaillard N, Meduri G, Lhomme C, Duviillard P, Benard J, Morice P. Impact of gonadotrophins and steroid hormones on tumour cells derived from borderline ovarian tumours. *Hum Reprod* 2006;**21**:3241–3245.
- Bast RC Jr, Boyer CM, Jacobs I, Xu FJ, Wu S, Wiener J, Kohler M, Berchuck A. Cell growth regulation in epithelial ovarian cancer. *Cancer* 1993;**71**:1597–1601.
- Benshushan A, Paltiel O, Brzezinski A, Tanos V, Barchana M, Shoshani O, Gordon L, Tsur L, Schenker JG. Ovulation induction and risk of endometrial cancer: a pilot study. *Eur J Obstet Gynecol Reprod Biol* 2001;**98**:53–57.
- Boomsma CM, Kavelaars A, Eijkemans MJ, Fauser BC, Heijnen CJ, Macklon NS. Ovarian stimulation for in vitro fertilization alters the intrauterine cytokine, chemokine, and growth factor milieu encountered by the embryo. *Fertil Steril* 2010;**94**:1764–1768.
- Boring CC, Squires TS, Tong T, Montgomery S. Cancer statistics, 1994. *CA Cancer J Clin* 1994;**44**:7–26.
- Brinton L. Long-term effects of ovulation-stimulating drugs on cancer risk. *Reprod Biomed Online* 2007;**15**:38–44.
- Brinton LA, Berman ML, Mortel R, Twigg LB, Barrett RJ, Wilbanks GD, Lannon L, Hoover RN. Reproductive, menstrual, and medical risk factors for endometrial cancer: results from a case-control study. *Am J Obstet Gynecol* 1992;**167**:1317–1325.
- Brinton LA, Lamb EJ, Moghissi KS, Scoccia B, Althuis MD, Mabie JE, Westhoff CL. Ovarian cancer risk associated with varying causes of infertility. *Fertil Steril* 2004;**82**:405–414.
- Brinton LA, Moghissi KS, Scoccia B, Westhoff CL, Lamb EJ. Ovulation induction and cancer risk. *Fertil Steril* 2005;**83**:261–274; quiz 525–266.
- Bristow RE, Karlan BY. Ovulation induction, infertility, and ovarian cancer risk. *Fertil Steril* 1996;**66**:499–507.
- Bukovic D, Segregur J, Radan M, Sovic T, Hrgovic Z, Simon SA, Fassbender WJ, Fajdic J. Extracorporeal fertilization in the world and in Croatia. *Med Arh* 2011;**65**:312–316.

- Bukovsky A. Immune system involvement in the regulation of ovarian function and augmentation of cancer. *Microsc Res Tech* 2006;**69**:482–500.
- Burmeister L, Healy DL. Ovarian cancer in infertility patients. *Ann Med* 1998;**30**:525–528.
- Calderon-Margalit R, Friedlander Y, Yanetz R, Kleinhaus K, Perrin MC, Manor O, Harlap S, Paltiel O. Cancer risk after exposure to treatments for ovulation induction. *Am J Epidemiol* 2009;**169**:365–375.
- Casagrande JT, Louie EW, Pike MC, Roy S, Ross RK, Henderson BE. 'Incessant ovulation' and ovarian cancer. *Lancet* 1979;**2**:170–173.
- CDC. Outline for a national plan for the prevention, detection and management of infertility, 2010. USA. <http://www.cdc.gov/art/PDF/NationalActionPlan.pdf>. (accessed 30 June 2012).
- Cetin I, Cozzi V, Antonazzo P. Infertility as a cancer risk factor - a review. *Placenta* 2008;**29**(Suppl. B):169–177.
- Chene G, Penault-Llorca F, Le Bouedec G, Mishellany F, Dauplat MM, Jaffeux P, Aublet-Cuvelier B, Pouly JL, Dechelotte P, Dauplat J. Ovarian epithelial dysplasia after ovulation induction: time and dose effects. *Hum Reprod* 2009;**24**:132–138.
- Chien CH, Wang FF, Hamilton TC. Transcriptional activation of c-myc proto-oncogene by estrogen in human ovarian cancer cells. *Mol Cell Endocrinol* 1994;**99**:11–19.
- Choi KC, Kang SK, Tai CJ, Auersperg N, Leung PC. Follicle-stimulating hormone activates mitogen-activated protein kinase in preneoplastic and neoplastic ovarian surface epithelial cells. *J Clin Endocrinol Metab* 2002;**87**:2245–2253.
- Choi JH, Choi KC, Auersperg N, Leung PC. Gonadotropins upregulate the epidermal growth factor receptor through activation of mitogen-activated protein kinases and phosphatidylinositol-3-kinase in human ovarian surface epithelial cells. *Endocr Relat Cancer* 2005;**12**:407–421.
- Choi JH, Wong AS, Huang HF, Leung PC. Gonadotropins and ovarian cancer. *Endocr Rev* 2007;**28**:440–461.
- Clinton GM, Hua W. Estrogen action in human ovarian cancer. *Crit Rev Oncol Hematol* 1997;**25**:1–9.
- Conn PM, Crowley WF Jr. Gonadotropin-releasing hormone and its analogs. *Annu Rev Med* 1994;**45**:391–405.
- Connolly M, Gallo F, Hoorens S, Ledger W. Assessing long-run economic benefits attributed to an IVF-conceived singleton based on projected lifetime net tax contributions in the UK. *Hum Reprod* 2009;**24**:626–632.
- Cottreau CM, Ness RB, Modugno F, Allen GO, Goodman MT. Endometriosis and its treatment with danazol or lupron in relation to ovarian cancer. *Clin Cancer Res* 2003;**9**:5142–5144.
- Cramer DW, Welch WR. Determinants of ovarian cancer risk. II. Inferences regarding pathogenesis. *J Natl Cancer Inst* 1983;**71**:717–721.
- Crosbie EJ, Menon U. Epithelial ovarian cancer and induction of ovulation. *Rev Gynaecol Pract* 2005;**5**:131–138.
- Croughan-Minihane MS, Camarano L, Feigenbaum S, Nelson H, Adamson GD, Cadieux MM. The risk of ovarian cancer associated with infertility and infertility treatments. *Fertil Steril* 2001;**76**:S69.
- Cusidó M, Fabregas R, Pere BS, Escayola C, Barri PN. Ovulation induction treatment and risk of borderline ovarian tumors. *Gynecol Endocrinol* 2007;**23**:373–376.
- Dahlgren E, Friberg LG, Johansson S, Lindstrom B, Oden A, Samsioe G, Janson PO. Endometrial carcinoma; ovarian dysfunction—a risk factor in young women. *Eur J Obstet Gynecol Reprod Biol* 1991;**41**:143–150.
- Dauplat J, Chene G, Pomel C, Dauplat MM, Le Bouedec G, Mishellany F, Lagarde N, Bignon YJ, Jaffeux P, Aublet-Cuvelier B et al. Comparison of dysplasia profiles in stimulated ovaries and in those with a genetic risk for ovarian cancer. *Eur J Cancer* 2009;**45**:2977–2983.
- Del Priore G, Robischon K, Phipps WR. Risk of ovarian cancer after treatment for infertility. *N Engl J Med* 1995;**332**:1300; author reply 1302.
- Devesa M, Barri PN, Coroleu B. Assisted reproductive technology and ovarian cancer. *Minerva Endocrinol* 2010;**35**:247–257.
- Dor J, Lerner-Geva L, Rabinovici J, Chetrit A, Levrant D, Lunenfeld B, Mashiach S, Modan B. Cancer incidence in a cohort of infertile women who underwent in vitro fertilization. *Fertil Steril* 2002;**77**:324–327.
- Doraiswamy V, Parrott JA, Skinner MK. Expression and action of transforming growth factor alpha in normal ovarian surface epithelium and ovarian cancer. *Biol Reprod* 2000;**63**:789–796.
- Doyle P, Maconochie N, Beral V, Swerdlow AJ, Tan SL. Cancer incidence following treatment for infertility at a clinic in the UK. *Hum Reprod* 2002;**17**:2209–2213.
- Egger M, Davey Smith G, Schneider M, Minder C. Bias in meta-analysis detected by a simple, graphical test. *BMJ* 1997;**315**:629–634.
- Escobedo LG, Lee NC, Peterson HB, Wingo PA. Infertility-associated endometrial cancer risk may be limited to specific subgroups of infertile women. *Obstet Gynecol* 1991;**77**:124–128.
- Fathalla MF. Incessant ovulation—a factor in ovarian neoplasia? *Lancet* 1971;**2**:163.
- Finnström O, Kallen B, Lindam A, Nilsson E, Nygren KG, Olausson PO. Maternal and child outcome after in vitro fertilization—a review of 25 years of population-based data from Sweden. *Acta Obstet Gynecol Scand* 2011;**90**:494–500.
- Fishel S, Jackson P. Follicular stimulation for high tech pregnancies: are we playing it safe? *BMJ* 1989;**299**:309–311.
- Franceschi S, La Vecchia C, Negri E, Guarneri S, Montella M, Conti E, Parazzini F. Fertility drugs and risk of epithelial ovarian cancer in Italy. *Hum Reprod* 1994;**9**:1673–1675.
- Gadducci A, Cosio S, Gargini A, Genazzani AR. Sex-steroid hormones, gonadotropin and ovarian carcinogenesis: a review of epidemiological and experimental data. *Gynecol Endocrinol* 2004;**19**:216–228.
- Glud E, Kjaer SK, Troisi R, Brinton LA. Fertility drugs and ovarian cancer. *Epidemiol Rev* 1998;**20**:237–257.
- Gocze P, Krommer K, Csermely T, Cziraky K, Garamvolgyi Z, Kovacs K, Szabo I. Ovulation induction therapy and malignant ovarian cancer. *Orv Hetil* 2000;**141**:71–75.
- Goodman MT, McDuffie K, Kolonel LN, Terada K, Donlon TA, Wilkens LR, Guo C, Le Marchand L. Case-control study of ovarian cancer and polymorphisms in genes involved in catecholestrogen formation and metabolism. *Cancer Epidemiol Biomarkers Prev* 2001;**10**:209–216.
- Goshen R, Weissman A, Shoham Z. Epithelial ovarian cancer, infertility and induction of ovulation: possible pathogenesis and updated concepts. *Baillieres Clin Obstet Gynaecol* 1998;**12**:581–591.
- Gregory CW, Wilson EM, Apparao KB, Lininger RA, Meyer WR, Kowalik A, Fritz MA, Lessey BA. Steroid receptor coactivator expression throughout the menstrual cycle in normal and abnormal endometrium. *J Clin Endocrinol Metab* 2002;**87**:2960–2966.
- Harlow BL, Weiss NS, Roth GJ, Chu J, Daling JR. Case-control study of borderline ovarian tumors: reproductive history and exposure to exogenous female hormones. *Cancer Res* 1988;**48**:5849–5852.
- Higgins JPT, Green S. Cochrane Handbook for Systematic Reviews of Interventions Version 5.1.0 [updated March 2011], 2011. The Cochrane Collaboration. [www.cochrane-handbook.org](http://www.cochrane-handbook.org).
- Homburg R. Polycystic ovary syndrome—from gynaecological curiosity to multisystem endocrinopathy. *Hum Reprod* 1996;**11**:29–39.
- Hu YL, Albanese C, Pestell RG, Jaffe RB. Dual mechanisms for lysophosphatidic acid stimulation of human ovarian carcinoma cells. *J Natl Cancer Inst* 2003;**95**:733–740.
- Huhtaniemi I. Are gonadotropins tumorigenic—a critical review of clinical and experimental data. *Mol Cell Endocrinol* 2010;**329**:56–61.
- Impicciatore GG, Tiboni GM. Ovulation inducing agents and cancer risk: review of literature. *Curr Drug Saf* 2011;**6**:250–258.
- International Collaboration of Epidemiological Studies of Cervical Cancer. Cervical carcinoma and reproductive factors: collaborative reanalysis of individual data on 16,563 women with cervical carcinoma and 33,542 women without cervical carcinoma from 25 epidemiological studies. *Int J Cancer* 2006;**119**:1108–1124.
- Jakobsson M, Gissler M, Tiitinen A, Paavonen J, Tapper AM. Treatment for cervical intraepithelial neoplasia and subsequent IVF deliveries. *Hum Reprod* 2008;**23**:2252–2255.
- Jensen A, Sharif H, Olsen JH, Kjaer SK. Risk of breast cancer and gynecologic cancers in a large population of nearly 50,000 infertile Danish women. *Am J Epidemiol* 2008;**168**:49–57.
- Jensen A, Sharif H, Frederiksen K, Kjaer SK. Use of fertility drugs and risk of ovarian cancer: Danish Population Based Cohort Study. *BMJ* 2009a;**338**:b249.
- Jensen A, Sharif H, Kjaer SK. Use of fertility drugs and risk of uterine cancer: results from a large Danish population-based cohort study. *Am J Epidemiol* 2009b;**170**:1408–1414.
- Joly DJ, Liliensfeld AM, Diamond EL, Bross ID. An epidemiologic study of the relationship of reproductive experience to cancer of the ovary. *Am J Epidemiol* 1974;**99**:190–209.
- Källén B. Maternal morbidity and mortality in in-vitro fertilization. *Best Pract Res Clin Obstet Gynaecol* 2008;**22**:549–558.



- Källén B, Finnstrom O, Nygren KG, Otterblad Olausson P, Wennerholm UB. In vitro fertilisation in Sweden: obstetric characteristics, maternal morbidity and mortality. *BJOG* 2005;**112**:1529–1535.
- Källén B, Finnstrom O, Lindam A, Nilsson E, Nygren KG, Olausson PO. Malignancies among women who gave birth after in vitro fertilization. *Hum Reprod* 2011;**26**:253–258.
- Kanakas N, Mantzavinos T. Fertility drugs and gynecologic cancer. *Ann N Y Acad Sci* 2006;**1092**:265–278.
- Karst AM, Drapkin R. Ovarian cancer pathogenesis: a model in evolution. *J Oncol* 2010;**2010**:932371.
- Kashyap S, Moher D, Fung MF, Rosenwaks Z. Assisted reproductive technology and the incidence of ovarian cancer: a meta-analysis. *Obstet Gynecol* 2004;**103**:785–794.
- Kelsey JL, LiVolsi VA, Holford TR, Fischer DB, Mostow ED, Schwartz PE, O'Connor T, White C. A case–control study of cancer of the endometrium. *Am J Epidemiol* 1982;**116**:333–342.
- Kimberly L, Case A, Cheung AP, Sierra S, AlAsiri S, Carranza-Mamane B, Dwyer C, Graham J, Havelock J, Hemmings R et al. Advanced reproductive age and fertility: no. 269, November 2011. *Int J Gynaecol Obstet* 2012;**117**:95–102.
- Klip H, Burger CW, Kenemans P, van Leeuwen FE. Cancer risk associated with subfertility and ovulation induction: a review. *Cancer Causes Control* 2000;**11**:319–344.
- Klip H, Burger CW, van Leeuwen FE. Risk of hormone-related cancers after ovarian stimulation for in-vitro fertilisation in a cohort of 25,152 women. In: Klip H (ed.). *Long Term Health Effects of Subfertility Treatment*. Ipskamp BV, Enschede, The Netherlands: Print Partners, 2002, 55–82.
- Konishi I. Gonadotropins and ovarian carcinogenesis: a new era of basic research and its clinical implications. *Int J Gynecol Cancer* 2006;**16**:16–22.
- Konishi I, Kuroda H, Mandai M. Review: gonadotropins and development of ovarian cancer. *Oncology* 1999;**57**(Suppl. 2):45–48.
- Kraemer S, Jaeger WH, Lang N. Growth regulation effects of gonadotropin induced steroidogenic response in human ovarian cancer. *Anticancer Res* 2001;**21**:2005–2010.
- Kristiansson P, Bjor O, Wransby H. Tumour incidence in Swedish women who gave birth following IVF treatment. *Hum Reprod* 2007;**22**:421–426.
- Labidi-Galy SI, Sisirak V, Meeus P, Gobert M, Treilleux I, Bajard A, Combes JD, Faget J, Mithieux F, Cassagnol A et al. Quantitative and functional alterations of plasmacytoid dendritic cells contribute to immune tolerance in ovarian cancer. *Cancer Res* 2011;**71**:5423–5434.
- Land JA, Evers JL. Risks and complications in assisted reproduction techniques: Report of an ESHRE consensus meeting. *Hum Reprod* 2003;**18**:455–457.
- Larsson SC, Mantzoros CS, Wolk A. Diabetes mellitus and risk of breast cancer: a meta-analysis. *Int J Cancer* 2007;**121**:856–862.
- La Vecchia C, Franceschi S, Parazzini F, Fasoli M, Decarli A, Gallus G, Tognoni G. Risk factors for gestational trophoblastic disease in Italy. *Am J Epidemiol* 1985;**121**:457–464.
- Lerner-Geva L, Geva E, Lessing JB, Chetrit A, Modan B, Amit A. The possible association between in vitro fertilization treatments and cancer development. *Int J Gynecol Cancer* 2003;**13**:23–27.
- Lerner-Geva L, Rabinovici J, Lunenfeld B. Ovarian stimulation: is there a long-term risk for ovarian, breast and endometrial cancer? *Womens Health (Lond Engl)* 2010;**6**:831–839.
- Liberati A, Altman DG, Tetzlaff J, Mulrow C, Gotzsche PC, Ioannidis JP, Clarke M, Devereaux PJ, Kleijnen J, Moher D. The PRISMA statement for reporting systematic reviews and meta-analyses of studies that evaluate health care interventions: explanation and elaboration. *J Clin Epidemiol* 2009;**62**:e1–34.
- Lopes P, Mensier A, Laurent FX, Laborde O, Sagot P, Jean M, Barriere P. Cancer of the ovary and medically assisted reproduction. *Contracept Fertil Sex* 1993;**21**:412–415.
- Lukanova A, Kaaks R. Endogenous hormones and ovarian cancer: epidemiology and current hypotheses. *Cancer Epidemiol Biomarkers Prev* 2005;**14**:98–107.
- MacLachlan V, Besanko M, O'Shea F, Wade H, Wood C, Trounson A, Healy DL. A controlled study of luteinizing hormone-releasing hormone agonist (buserelin) for the induction of folliculogenesis before in vitro fertilization. *N Engl J Med* 1989;**320**:1233–1237.
- Mahdavi A, Pejovic T, Nezhat F. Induction of ovulation and ovarian cancer: a critical review of the literature. *Fertil Steril* 2006;**85**:819–826.
- Meirow D, Schenker JG. The link between female infertility and cancer: epidemiology and possible aetiologies. *Hum Reprod Update* 1996;**2**:63–75.
- Merviel P, Cabry R, Boulard V, Lourdel E, Olieric MF, Claeys C, Demailly P, Devaux A, Copin H. Ovarian stimulation and follicular puncture risks. *Gynecol Obstet Fertil* 2009;**37**:926–933.
- Modan B, Ron E, Lerner-Geva L, Blumstein T, Menczer J, Rabinovici J, Oelsner G, Freedman L, Mashiach S, Lunenfeld B. Cancer incidence in a cohort of infertile women. *Am J Epidemiol* 1998;**147**:1038–1042.
- Mohle J, Whittemore A, Pike M, Darby S. Gonadotrophins and ovarian cancer risk. *J Natl Cancer Inst* 1985;**75**:178–180.
- Mosgaard BJ, Lidegaard O, Kjaer SK, Schou G, Andersen AN. Infertility, fertility drugs, and invasive ovarian cancer: a case–control study. *Fertil Steril* 1997;**67**:1005–1012.
- Mosgaard BJ, Lidegaard O, Kjaer SK, Schou G, Andersen AN. Ovarian stimulation and borderline ovarian tumors: a case–control study. *Fertil Steril* 1998;**70**:1049–1055.
- Murdoch WJ. Metaplastic potential of p53 down-regulation in ovarian surface epithelial cells affected by ovulation. *Cancer Lett* 2003;**191**:75–81.
- Navaratnarajah R, Pillay OC, Hardiman P. Polycystic ovary syndrome and endometrial cancer. *Semin Reprod Med* 2008;**26**:62–71.
- Ness RB, Cottreau C. Possible role of ovarian epithelial inflammation in ovarian cancer. *J Natl Cancer Inst* 1999;**91**:1459–1467.
- Ness RB, Cramer DW, Goodman MT, Kjaer SK, Mallin K, Mosgaard BJ, Purdie DM, Risch HA, Vergona R, Wu AH. Infertility, fertility drugs, and ovarian cancer: a pooled analysis of case–control studies. *Am J Epidemiol* 2002;**155**:217–224.
- Ness RB, Modugno F. Endometriosis as a model for inflammation-hormone interactions in ovarian and breast cancers. *Eur J Cancer* 2006;**42**:691–703.
- NICE. *Fertility: Assessment and Treatment for People with Fertility Problems*. National Collaborating Centre for Women's and Children's Health. London: National Institute for Clinical Excellence, 2004.
- Nieto JJ, Crow J, Sundaresan M, Constantinovici N, Perrett CW, MacLean AB, Hardiman PJ. Ovarian epithelial dysplasia in relation to ovulation induction and nulliparity. *Gynecol Oncol* 2001;**82**:344–349.
- Ohtani K, Sakamoto H, Kikuchi A, Nakayama Y, Idei T, Igarashi N, Matukawa T, Satoh K. Follicle-stimulating hormone promotes the growth of human epithelial ovarian cancer cells through the protein kinase C-mediated system. *Cancer Lett* 2001;**166**:207–213.
- Oktay K, Kim JY, Barad D, Babayev SN. Association of BRCA1 mutations with occult primary ovarian insufficiency: a possible explanation for the link between infertility and breast/ovarian cancer risks. *J Clin Oncol* 2010;**28**:240–244.
- Olivennes F. The use of gonadotropin-releasing hormone antagonist in ovarian stimulation. *Clin Obstet Gynecol* 2006;**49**:12–22.
- Parazzini F, Negri E, La Vecchia C, Moroni S, Franceschi S, Crosignani PG. Treatment for infertility and risk of invasive epithelial ovarian cancer. *Hum Reprod* 1997;**12**:2159–2161.
- Parazzini F, Pelucchi C, Negri E, Franceschi S, Talamini R, Montella M, La Vecchia C. Use of fertility drugs and risk of ovarian cancer. *Hum Reprod* 2001a;**16**:1372–1375.
- Parazzini F, Ricci E, Rosa C, Negri E, La Vecchia C. Risk of endometrial cancer after use of fertility drugs. *Hum Reprod* 2001b;**16**:196.
- Parazzini F, Pelucchi C, Talamini R, Montella M, La Vecchia C. Use of fertility drugs and risk of endometrial cancer in an Italian case–control study. *Eur J Cancer Prev* 2010;**19**:428–430.
- Parikh S, Brennan P, Boffetta P. Meta-analysis of social inequality and the risk of cervical cancer. *Int J Cancer* 2003;**105**:687–691.
- Parrott JA, Doraiswamy V, Kim G, Mosher R, Skinner MK. Expression and actions of both the follicle stimulating hormone receptor and the luteinizing hormone receptor in normal ovarian surface epithelium and ovarian cancer. *Mol Cell Endocrinol* 2001;**172**:213–222.
- Paulson RJ. Fertility drugs and ovarian epithelial cancer: the endometriosis hypothesis. *J Assist Reprod Genet* 1997;**14**:228–230.
- Permeth-Wey J, Sellers TA. Epidemiology of ovarian cancer. *Methods Mol Biol* 2009;**472**:413–437.
- Potashnik G, Lerner-Geva L, Genkin L, Chetrit A, Lunenfeld E, Porath A. Fertility drugs and the risk of breast and ovarian cancers: results of a long-term follow-up study. *Fertil Steril* 1999;**71**:853–859.
- Purdie D, Green A, Bain C, Siskind V, Ward B, Hacker N, Quinn M, Wright G, Russell P, Susil B. Reproductive and other factors and risk of epithelial ovarian

- cancer: an Australian case-control study. Survey of Women's Health Study Group. *Int J Cancer* 1995;**62**:678–684.
- Riman T, Dickman PW, Nilsson S, Correia N, Nordlinder H, Magnusson CM, Persson IR. Risk factors for invasive epithelial ovarian cancer: results from a Swedish case-control study. *Am J Epidemiol* 2002;**156**:363–373.
- Rimon E, Sasson R, Dantes A, Land-Bracha A, Amsterdam A. Gonadotropin-induced gene regulation in human granulosa cells obtained from IVF patients: modulation of genes coding for growth factors and their receptors and genes involved in cancer and other diseases. *Int J Oncol* 2004;**24**:1325–1338.
- Risch HA. Hormonal etiology of epithelial ovarian cancer, with a hypothesis concerning the role of androgens and progesterone. *J Natl Cancer Inst* 1998;**90**:1774–1786.
- Risch HA, Marrett LD, Jain M, Howe GR. Differences in risk factors for epithelial ovarian cancer by histologic type. Results of a case-control study. *Am J Epidemiol* 1996;**144**:363–372.
- Rodriguez C, Tatham LM, Calle EE, Thun MJ, Jacobs EJ, Heath CW Jr. Infertility and risk of fatal ovarian cancer in a prospective cohort of US women. *Cancer Causes Control* 1998;**9**:645–651.
- Roger P, Pujol P, Lucas A, Baldet P, Rochefort H. Increased immunostaining of fibulin-1, an estrogen-regulated protein in the stroma of human ovarian epithelial tumors. *Am J Pathol* 1998;**153**:1579–1588.
- Ron E, Lunenfeld B, Menczer J, Blumstein T, Katz L, Oelsner G, Serr D. Cancer incidence in a cohort of infertile women. *Am J Epidemiol* 1987;**125**:780–790.
- Rossing MA, Daling JR, Weiss NS, Moore DE, Self SG. Ovarian tumors in a cohort of infertile women. *N Engl J Med* 1994;**331**:771–776.
- Rossing MA, Daling JR, Weiss NS, Moore DE, Self SG. In situ and invasive cervical carcinoma in a cohort of infertile women. *Fertil Steril* 1996;**65**:19–22.
- Rossing MA, Tang MT, Flagg EW, Weiss LK, Wicklund KG. A case-control study of ovarian cancer in relation to infertility and the use of ovulation-inducing drugs. *Am J Epidemiol* 2004;**160**:1070–1078.
- Salehi F, Dunfield L, Phillips KP, Krewski D, Vanderhyden BC. Risk factors for ovarian cancer: an overview with emphasis on hormonal factors. *J Toxicol Environ Health B Crit Rev* 2008;**11**:301–321.
- Sanner K, Conner P, Bergfeldt K, Dickman P, Sundfeldt K, Bergh T, Hagenfeldt K, Janson PO, Nilsson S, Persson I. Ovarian epithelial neoplasia after hormonal infertility treatment: long-term follow-up of a historical cohort in Sweden. *Fertil Steril* 2009;**91**:1152–1158.
- Schildkraut JM, Schwingsl PJ, Bastos E, Evanoff A, Hughes C. Epithelial ovarian cancer risk among women with polycystic ovary syndrome. *Obstet Gynecol* 1996;**88**:554–559.
- Senöz S, Gulekli B, Gulenbay N. Molar pregnancies associated with clomiphene citrate. *J Endocrinol Invest* 1996;**19**:256–257.
- Shapiro S. Risk of ovarian cancer after treatment for infertility. *N Engl J Med* 1995;**332**:1301; author reply 1302.
- Sheng L, Liu DY, Shen K. [Preliminary study on pathway of follicle-stimulating hormone on human epithelial ovarian cancer cell proliferation]. *Zhonghua Fu Chan Ke Za Zhi* 2003;**38**:752–755.
- Shoham Z. Epidemiology, etiology, and fertility drugs in ovarian epithelial carcinoma: where are we today? *Fertil Steril* 1994;**62**:433–448.
- Shu XO, Brinton LA, Gao YT, Yuan JM. Population-based case-control study of ovarian cancer in Shanghai. *Cancer Res* 1989;**49**:3670–3674.
- Shushan A, Paltiel O, Iscovich J, Elchalal U, Peretz T, Schenker JG. Human menopausal gonadotropin and the risk of epithelial ovarian cancer. *Fertil Steril* 1996;**65**:13–18.
- Silva Idos S, Wark PA, McCormack VA, Mayer D, Overton C, Little V, Nieto J, Hardiman P, Davies M, MacLean AB. Ovulation-stimulation drugs and cancer risks: a long-term follow-up of a British cohort. *Br J Cancer* 2009;**100**:1824–1831.
- Smith ER, Xu XX. Ovarian ageing, follicle depletion, and cancer: a hypothesis for the aetiology of epithelial ovarian cancer involving follicle depletion. *Lancet Oncol* 2008;**9**:1108–1111.
- Soegaard M, Jensen A, Hogdall E, Christensen L, Hogdall C, Blaakaer J, Kjaer SK. Different risk factor profiles for mucinous and nonmucinous ovarian cancer: results from the Danish MALOVA study. *Cancer Epidemiol Biomarkers Prev* 2007;**16**:1160–1166.
- Spandorfer SD, Bongiovanni AM, Fasioulotis S, Rosenwaks Z, Ledger WJ, Witkin SS. Prevalence of cervical human papillomavirus in women undergoing in vitro fertilization and association with outcome. *Fertil Steril* 2006;**86**:765–767.
- Stadel BV. Letter: The etiology and prevention of ovarian cancer. *Am J Obstet Gynecol* 1975;**123**:772–774.
- StataCorp. *Stata Quick Reference and Index*. College Station, TX, USA: StataCorp LP, 2009.
- Stephen EH, Chandra A. Updated projections of infertility in the United States: 1995–2025. *Fertil Steril* 1998;**70**:30–34.
- Stewart LM, Holman CD, Hart R, Bulsara MK, Preen DB, Finn JC. In vitro fertilization and breast cancer: is there cause for concern? *Fertil Steril* 2012.
- Strehler E, Sterzik K, Malthaner D, Hoyer H, Nindl I, Schneider A. Influence of ovarian stimulation on the detection of human papillomavirus DNA in cervical scrapes obtained from patients undergoing assisted reproductive techniques. *Fertil Steril* 1999;**71**:815–820.
- Sueblinvong T, Carney ME. Current understanding of risk factors for ovarian cancer. *Curr Treat Options Oncol* 2009;**10**:67–81.
- Tonguç E, Ceylaner G, Var T, Zulfkaroglu E, Ceylaner S. Ovulation induction with gonadotropins causes increased sister chromatid exchanges. *Genet Couns* 2011;**22**:193–198.
- Unkila-Kallio L, Leminen A, Tiitinen A, Lehtovirta P, Wahlstrom T, Ylikorkkala O. Malignant tumors of the ovary or the breast in association with infertility: a report of thirteen cases. *Acta Obstet Gynecol Scand* 1997;**76**:177–181.
- Unkila-Kallio L, Leminen A, Tiitinen A, Ylikorkkala O. Nationwide data on falling incidence of ovarian granulosa cell tumours concomitant with increasing use of ovulation inducers. *Hum Reprod* 1998;**13**:2828–2830.
- Unkila-Kallio L, Tiitinen A, Wahlstrom T, Lehtovirta P, Leminen A. Reproductive features in women developing ovarian granulosa cell tumour at a fertile age. *Hum Reprod* 2000;**15**:589–593.
- van Hamont D, Nissen LH, Siebers AG, Hendriks JC, Melchers WJ, Kremer JA, Massuger LF. Abnormal cervical cytology in women eligible for IVF. *Hum Reprod* 2006;**21**:2359–2363.
- van Leeuwen FE, Klip H, Mooij TM, van de Swaluw AM, Lambalk CB, Kortman M, Laven JS, Jansen CA, Helmerhorst FM, Cohlen BJ et al. Risk of borderline and invasive ovarian tumours after ovarian stimulation for in vitro fertilization in a large Dutch cohort. *Hum Reprod* 2011;**26**:3456–3465.
- Venn A, Watson L, Lumley J, Giles G, King C, Healy D. Breast and ovarian cancer incidence after infertility and in vitro fertilisation. *Lancet* 1995;**346**:995–1000.
- Venn A, Watson L, Bruinsma F, Giles G, Healy D. Risk of cancer after use of fertility drugs with in-vitro fertilisation. *Lancet* 1999;**354**:1586–1590.
- Venn A, Hemminki E, Watson L, Bruinsma F, Healy D. Mortality in a cohort of IVF patients. *Hum Reprod* 2001a;**16**:2691–2696.
- Venn A, Jones P, Quinn M, Healy D. Characteristics of ovarian and uterine cancers in a cohort of in vitro fertilization patients. *Gynecol Oncol* 2001b;**82**:64–68.
- Venn A, Healy D, McLachlan R. Cancer risks associated with the diagnosis of infertility. *Best Pract Res Clin Obstet Gynaecol* 2003;**17**:343–367.
- Vlahos N. Parity, fertility drugs, and ovarian cancer. *Fertil Steril* 1998;**69**:168–169.
- Vlahos NF, Economopoulos KP, Creasas G. Fertility drugs and ovarian cancer risk: a critical review of the literature. *Ann N Y Acad Sci* 2010a;**1205**:214–219.
- Vlahos NF, Economopoulos KP, Fotiou S. Endometriosis, in vitro fertilisation and the risk of gynaecological malignancies, including ovarian and breast cancer. *Best Pract Res Clin Obstet Gynaecol* 2010b;**24**:39–50.
- Vo C, Carney ME. Ovarian cancer hormonal and environmental risk effect. *Obstet Gynecol Clin North Am* 2007;**34**:687–700, viii.
- Wang J, Luo F, Lu JJ, Chen PK, Liu P, Zheng W. VEGF expression and enhanced production by gonadotropins in ovarian epithelial tumors. *Int J Cancer* 2002;**97**:163–167.
- Webb PM. Fertility drugs and ovarian cancer. *BMJ* 2009;**338**:a3075.
- Wells GA, Shea B, O'Connell D, Peterson J, Welch V, Losos M, Tugwell P. The Newcastle-Ottawa Scale (NOS) for assessing the quality if nonrandomized studies in meta-analyses. Dept of Epidemiology and Community Medicine, University of Ottawa: Ottawa, Canada. ([http://www.ohri.ca/programs/clinical\\_epidemiology/oxford.htm](http://www.ohri.ca/programs/clinical_epidemiology/oxford.htm) (accessed 30.6.2012)). 2011.
- Whittemore AS, Harris R, Itnyre J. Characteristics relating to ovarian cancer risk: collaborative analysis of 12 US case-control studies. II. Invasive epithelial ovarian cancers in white women. Collaborative Ovarian Cancer Group. *Am J Epidemiol* 1992;**136**:1184–1203.
- Willemsen W, Kruitwagen R, Bastiaans B, Hanselaar T, Rolland R. Ovarian stimulation and granulosa-cell tumour. *Lancet* 1993;**341**:986–988.
- Wimalasena J, Dostal R, Meehan D. Gonadotropins, estradiol, and growth factors regulate epithelial ovarian cancer cell growth. *Gynecol Oncol* 1992;**46**:345–350.

- Wright VC, Schieve LA, Reynolds MA, Jeng G. Assisted reproductive technology surveillance—United States, 2002. *MMWR Surveill Summ* 2005;**54**:1–24.
- Wysowski DK. Use of fertility drugs in the United States, 1973 through 1991. *Fertil Steril* 1993;**60**:1096–1098.
- Yli-Kuha AN, Gissler M, Klemetti R, Luoto R, Hemminki E. Cancer morbidity in a cohort of 9175 Finnish women treated for infertility. *Hum Reprod* 2012;**27**:1149–1155.
- Zheng W, Lu JJ, Luo F, Zheng Y, Feng Y, Felix JC, Lauchlan SC, Pike MC. Ovarian epithelial tumor growth promotion by follicle-stimulating hormone and inhibition of the effect by luteinizing hormone. *Gynecol Oncol* 2000;**76**:80–88.
- Zreik TG, Ayoub CM, Hannoun A, Karam CJ, Munkarah AR. Fertility drugs and risk of ovarian cancer: dispelling the myth. *Curr Opin Obstet Gynecol* 2008;**20**:313–319.
